# Supplementary material
Source: PubMed Central journal article supplement (PMC11304120)
Supplement: jama-e248772-s002.pdf [file jama-e248772-s002.pdf]

## Supplemental Online Content

Ware LB, Files DC, Fowler A, et al; National Heart, Lung, and Blood Institute Prevention and Early Treatment of Acute Lung Injury Clinical Trials Network. Phase 2b Randomized trial of acetaminophen for prevention and treatment of organ dysfunction in critically ill patients with sepsis. *JAMA*. doi:10.1001/jama.2024.8772

### Collaborators

**eTable 1.** Plasma biomarker levels at baseline and study day 2 and day 3 by treatment group

eTable 2. Daily AST, ALT and bilirubin levels in acetaminophen and matched placebo

**eTable 3.** Fluid balance (ml) by study day

**eTable 4a.** Adverse events by organ system and severity in acetaminophen and matched placebo

**eTable 4b.** Listings of all adverse events in acetaminophen group

**eTable 5.** Comparison of baseline patient characteristics between the higher and lower cell-free hemoglobin groups

**eTable 6.** Secondary outcomes by treatment in higher (>10 mg/dl) and lower  $\leq$  10 mg/dL baseline cell-free hemoglobin level groups

**eFigure 1.** Change in individual components Sequential Organ Failure Assessment (SOFA) scores from enrollment to day 7 by treatment arm

**eFigure 2a.** Total and component SOFA scores from enrollment to day 7 by treatment arm in the higher cell-free hemoglobin group ( $>$  10 mg/dL)

**eFigure 2b.** Total and component SOFA scores from enrollment to day 7 by treatment arm in the lower cell-free hemoglobin group ( $\leq$  10 mg/dL)

**eFigure 3a.** 28-day all-cause mortality categorized by cell-free hemoglobin level

**eFigure 3b.** Non-linear relationship between cell-free hemoglobin and 28-day all-cause mortality by treatment arm

This supplemental material has been provided by the authors to give readers additional information about their work.

## I. Collaborators

### **Acetaminophen and Ascorbate in Sepsis: Targeted Therapy to Enhance Recovery (ASTER)**

The National Heart, Lung, and Blood Institute Prevention and Early Treatment of Acute Lung Injury (PETAL) Clinical Trials Network:

**ALIGN Clinical Center:** Baystate Medical Center –Jay S Steingrub\*, Howard Smithline, Mark Tidswell, Lori Kozikowski, Sherell Thornton-Thompson, Lesley De Souza, Cynthia Kardos, Sarah Romain, Scott Oullette; Brigham and Women’s Hospital –Peter Hou\*, Rebecca M Baron; Lahey Clinic--Christopher Hansen, Victor Pinto Plata, Yuxiu Lei; Maine Medical--Richard Riker, Christine Lord and Meghan Searight

**BOSTON Clinical Center:** Beth Israel Deaconess Medical Center –Nathan I Shapiro\*, Daniel Talmor\*, Valerie Goodspeed, Bryan Stenson MD, Joshua Ellis MD, Alon Dagan MD, Tatyana Shilvkina MD, Rupinder Sekhon MD, Carlo Ottanelli, Ana Grafals, Kim Redman, Madhavan Das, Nadim Kattouf, Alessio Barca, Alexander Weingart; Massachusetts General Hospital –Michael R Filbin, Kathryn Hibbert, Blair Alden Parry, Justin Margolin; University of Mississippi Medical Center –Alan E Jones, James Galbraith, Utsav Nandi

**CALIFORNIA Clinical Center:** UCSF San Francisco -Michael Matthay MD\*, Carolyn Hendrickson, Kirsten Kangelaris, MD, Taarini Hariharan, Rachel Gropper, Kimia Ashktorab, Anika Agrawal, Emma Schmiede, Hanjing Zhuo, Carolyn Leroux; UCLA–Steven Y Chang, Gregory W Hende\*, George Lim, Hena Sihota; Stanford Health Care –Joseph E Levitt, Jenny G Wilson, Angela J Rogers, Rosemary Vojnik, Shreya Battu, Cynthia Perez; UC Davis –Timothy E Albertson, Brian Morrissey, Katherine Wick, Erin Hardy, Ruchira Puri, Tessa Hafenstein; UCSF Fresno –Alyssa Hughes, Eyad Almasri, Shelly Hibbard; University of Texas –Bela Patel, Bindu Akkanti, Pratik Doshi, Gabriel Patarroyo Aponte, Ryan Huebinger, Elizabeth Vidales, Idorenyin Udoh-Bradford

**COLORADO Clinical Center:** University of Colorado Hospital –Neil Aggarwal\*, Adit A Ginde\*, Jeffrey McKeenan, Carrie Higgins, Ashley Licursi, Jennifer Fickes-Siler, Suzanne Slaughter, Emily Johnson. Denver Health Medical Center –Ivor S Douglas\*, Jason Haukoos, Stacy Trent, Terra Hiller, Carolyn Lyle, Ana Garcia, Stephanie Gravitz, Darwyn Tran, Mia Lundin. Medical Center of the Rockies–Julie Dunn, Eric Stevens, Nikiah Nudell, Bridget Baxter, Scott Bins, Brittany Smoot, Nichol Huckins

**MICHIGAN Clinical Center:** University of Michigan Medical Center –Ivan N Co, Pauline K Park\*, Robert Hyzy\*, Kristine Nelson, J Victor Jimenez, Jakob I McSparron, Elizabeth Munroe, Phillip Choi, Shijing Jia, Normal Olbrich; Wayne State University—Robert Sherwin, Thomas Mazzocco, Lauren Buck, Teja Pandrangi; Henry Ford Health--Jennifer Swiderek, Emanuel P Rivers, Jasreen Kaur Gill, Jacqueline Day, Anja Kathrina Jaehne

**MONTEFIORE-SINAI Clinical Center:** Montefiore Moses—Michelle Ng Gong\*, Ari Moskowitz, Amira Mohamed, Martha Torres, Ofelia Garcia; Montefiore Weiler –Luke Andrea, Brenda Lopez, Sabah Boujid, Manuel Hache Marliere; Mt. Sinai Hospital—Lynne D Richardson\*, Samuel Acquah,

Neha Goel, Patrick Maher; University of Arizona— Jarrod M Mosier, Cameron Hypes, Elizabeth Salvagio Campbell, Anitza A. Lopez, Mary Labus

**OHIO Clinical Center:** University of Cincinnati Medical Center – Kristin M Hudock, R. Duncan Hite\*, Hammad Tanzeem, Harshada More, B. Ashraf M. Khallaf, Benjamin S. Williams; Cleveland Clinic Foundation –Abhijit Duggal\*, Siddharth Dugar, Simon Mucha, Omar Mehkri, Kiran Ashok, Caleb Chang; Ohio State University Wexner Medical Center—Sonal Pannu, Matthew Exline, Henry Wang, Sarah Karow, Gabrielle Swoope, Maryiam Khan, David Smith, Madison So, Elli Schwartz, M. Kelly Johnson

**PACIFIC NORTHWEST Clinical Center:** Harborview Medical Center –Nicholas J Johnson, Bryce RH Robinson\*, Stephanie Gundel, Megan Fuentes, Maranda Newton, Emily Petersen, Kathryn Thompson, Armando Rodriguez, Thomas Paulsen, Arshdeep Kaur; Oregon Health and Science University – Catherine L Hough\*, Molly Ward, Madeline McDougal, Efrain Chavez Martinez, Edlyn Wolwowicz, Otmar Borchard III, Akram Khan; Cedars Sinai Medical Center—Peter Chen, Ethan Pascual, Po-En Chen, Yunhee Choi-Kuaea; Swedish Hospital First Hill—Shane O’Mahony, Julie Wallick, Alexandria Duven, Dakota Fletcher

**PITTSBURGH Clinical Center:** UPMC Presbyterian, Shadyside & Mercy—Alexandra Weissman, Donald M Yealy\*, Denise Scholl, Bryan J McVerry, David T Huang, Michael A Turturro, Derek C Angus\*; Penn State Hershey Medical Center – Jordan Schooler, Lawrence E Kass; Temple University Hospital—Nina T Gentile, Nathaniel Marchetti, Hannah Reimer

**SOUTHEAST Clinical Center:** Wake Forest Baptist Health –D. Clark Files\*, Kevin W Gibbs, Chadwick Miller\*, Lori Flores, Lisa Parks, Leigha Landreth, Lauren Koehler; Virginia Commonwealth University Medical Center– Alpha A (Berry) Fowler III, Marjolein de Wit, Jessica Mason, Aamer Syed; Medical University of South Carolina –Andrew J Goodwin, Abbey Grady, Caitlan Lematty, Charles Terry, Melissa Blender ; University of Virginia Medical Center—Jeffrey Sturek, Mark Sochor, Mary Marshall, Miranda West, Ashley Simpson; Carolinas Medical Center-- Nikhil Patel, Bryce Taylor, Daxita Patel, Jessica Kearney-Bryan; Sentara Norfolk General Hospital-- Xian Qiao, Kate Mitchell

**UTAH:** Intermountain Medical Center – Daniel Knox, Lindsay M Leither, Michael Lanspa, Samuel M Brown\*, Ithan Peltan, Andrew Gray, Valerie Aston, Tyler Burke, Joshua Jeppsen, Hunter Marshall, Carolyn Klippel, Brent Armbruster, Darrin Applegate; University of Utah Hospital – Estelle Harris, Elizabeth A Middleton, Sean J Callahan, Lindsey J Waddoups, Misty B Yamane, Macy AG Barrios

**VANDERBILT Clinical Center:** Vanderbilt University Medical Center –Todd Rice, Wes Self, Matt Semler, Margaret Hays, Liza Frawley, Nancy Wickersham, Nathan Putz, Samantha Gonski, Jason Lin, Nury Lee; University of Alabama Birmingham—David B Page, Derek W Russell, Donna S Harris, Sheetal Gandotra,

**Clinical Coordinating Center:** Massachusetts General Hospital Biostatistics Center (CCC): David A Schoenfeld\*, B. Taylor Thompson\*, Douglas L Hayden, Nancy Ringwood, Cathryn Oldmixon, Richard Morse, Ariela Muzikansky, Laura Fitzgerald, Adrian Lagakos, Weixing Huang, Poying Lai, Grace Carey

**Steering Committee Chair:** Roy G Brower

**National Heart, Lung, and Blood Institute:** Antonello Punturieri, Lora A Reineck, Karen Bienstock, Ejigayehu Demissie, Michelle Freemer, James Kiley, Lauren Kunz, Mario Stylianou, Myron Maclawiw, Gail Weinmann

**Protocol Review Committee:** Laurie J Morrison, Daniel Brodie, Charles B Cairns, Mark N Gillespie, Richard J Kryscio, Damon Scales, Robert D. Truog

**Data and Safety Monitoring Board:** Polly Parsons, Jason D Christie, Neal Dickert Jr., Deborah Diercks, Jesse R Hall, Nicholas J Horton, Mitchell Levy, Mark Siegel, Ian Stiell, Laurie S Zoloth

*\*Clinical Center or CCC Principal Investigator*

## II. Supplemental Tables

eTable 1. Plasma biomarker levels at baseline and study day 2 and day 3 by treatment group

| Analyte                   |          | Acetaminophen            |                         | Placebo                  | Change from Baseline    |      | p value |
|---------------------------|----------|--------------------------|-------------------------|--------------------------|-------------------------|------|---------|
|                           |          | Acetaminophen            | Placebo                 | Acetaminophen            | Placebo                 |      |         |
| Interleukin-6<br>(pg/mL)  | Baseline | 31.8 [15.5, 170.0] 219   | 37.2 [14.9, 103.3] 213  |                          |                         |      |         |
|                           | Day 2    | 13.9 [6.6, 40.0] 195     | 18.7 [7.3, 45.1] 188    | -19.1 [-127.3, -1.7] 190 | -16.2 [-76.2, 0.0] 186  | 0.27 |         |
|                           | Day 3    | 11.5 [5.3, 24.3] 180     | 13.7 [6.3, 31.4] 174    | -22.8 [-130.5, -3.9] 175 | -18.3 [-82.1, -0.9] 171 | 0.20 |         |
| Angiopoietin-2<br>(pg/mL) | Baseline | 9144 [5518, 15877] 219   | 9521 [5513, 19963] 212  |                          |                         |      |         |
|                           | Day 2    | 7467 [4838, 13151] 195   | 8006 [4930, 14610] 187  | -1519 [-6215, 2339] 190  | -1696 [-6162, 1367] 184 | 0.56 |         |
|                           | Day 3    | 6420 [4291, 10952] 180   | 7024 [4230, 10504] 174  | -2218 [-6961, 1135] 175  | -2775 [-8990, -24] 170  | 0.23 |         |
| TNF Receptor-1<br>(pg/mL) | Baseline | 5379 [3567, 10064] 218   | 6520 [3441, 10630] 211  |                          |                         |      |         |
|                           | Day 2    | 4626 [2923, 7626] 195    | 5273 [3031, 8850] 187   | -537 [-2147, 787] 190    | -669 [-2535, 474] 183   | 0.31 |         |
|                           | Day 3    | 4630 [2741, 7431] 179    | 4825 [3280, 8537] 173   | -735 [-2336, 410] 174    | -956 [-3509, 323] 169   | 0.30 |         |
| Syndecan-1<br>(ng/mL)     | Baseline | 150.0 [99.0, 285.0] 219  | 144.5 [97.3, 245.2] 213 |                          |                         |      |         |
|                           | Day 2    | 150.9 [100.7, 329.5] 192 | 132.9 [94.4, 269.1] 188 | 3.9 [-56.1, 92.5] 187    | -6.4 [-57.1, 69.3] 186  | 0.41 |         |
|                           | Day 3    | 171.7 [109.5, 414.2] 179 | 141.9 [98.2, 274.1] 172 | 21.5 [-66.2, 138.3] 174  | 3.6 [-42.8, 66.4] 169   | 0.42 |         |

| Analyte                         |          |                       |                          | Change from Baseline    |                            |         |
|---------------------------------|----------|-----------------------|--------------------------|-------------------------|----------------------------|---------|
|                                 |          | Acetaminophen         | Placebo                  | Acetaminophen           | Placebo                    | p value |
| Cell-free DNA<br>(ng/uL)        | Baseline | 1.17 [0.94, 1.61] 218 | 1.16 [0.92, 1.65]<br>213 |                         |                            |         |
|                                 | Day 2    | 1.05 [0.89, 1.40] 193 | 1.08 [0.93, 1.48]<br>187 | -0.09 [-0.43, 0.18] 187 | -0.04 [-0.29, 0.28]<br>185 | 0.05    |
|                                 | Day 3    | 1.07 [0.86, 1.47] 178 | 1.11 [0.90, 1.45]<br>171 | -0.05 [-0.39, 0.20] 173 | -0.08 [-0.37, 0.22]<br>168 | 0.97    |
| Cell-free Hemoglobin<br>(mg/dL) | Baseline | 8.3 [4.4, 17.0] 218   | 8.5 [4.6, 18.6] 212      |                         |                            |         |
|                                 | Day 2    | 7.0 [4.1, 13.1] 191   | 6.7 [4.3, 10.9] 187      | -1.2 [-8.9, 4.4] 185    | -1.2 [-8.4, 3.2] 184       | 0.87    |
|                                 | Day 3    | 6.3 [4.2, 13.3] 177   | 6.7 [3.8, 12.5] 171      | -1.0 [-10.0, 3.8] 171   | -2.2 [-9.7, 5.0] 167       | 0.99    |

Median [q1, q3] N

p-value is from Wilcoxon Rank-Sum Test

eTable 2. Daily AST, ALT and Bilirubin levels in acetaminophen and matched placebo\*

|                   |          | Acetaminophen     | Placebo             | Difference (95% CI)    | P-value |
|-------------------|----------|-------------------|---------------------|------------------------|---------|
| AST (U/L)         | Baseline | 45.5 (35.0), 227  | 40.4 (37.2), 199    | 5.1 (-1.8, 11.9)       | 0.15    |
|                   | Day 1    | 68.7 (208.9), 176 | 48.1 (52.6), 144    | 20.6 (-14.5, 55.7)     | 0.25    |
|                   | Day 2    | 54.5 (198.9), 211 | 54.0 (224.0), 189   | 0.5 (-41.1, 42.0)      | 0.98    |
|                   | Day 3    | 44.0 (50.3), 191  | 43.2 (111.5), 178   | 0.7 (-16.8, 18.2)      | 0.93    |
|                   | Day 4    | 56.3 (111.8), 178 | 49.2 (119.8), 164   | 7.1 (-17.6, 31.7)      | 0.57    |
|                   | Day 5    | 51.7 (101.4), 161 | 169.9 (1571.5), 145 | -118.2 (-362.4, 126.0) | 0.34    |
|                   | Day 6    | 51.7 (67.7), 102  | 210.0 (1667.5), 95  | -158.3 (-484.2, 167.5) | 0.34    |
|                   | Day 7    | 40.4 (40.0), 116  | 35.2 (38.7), 98     | 5.3 (-5.4, 15.9)       | 0.33    |
| ALT (U/L)         | Baseline | 30.9 (26.6), 227  | 31.0 (34.2), 199    | -0.1 (-5.9, 5.7)       | 0.97    |
|                   | Day 1    | 44.6 (101.9), 178 | 36.7 (46.4), 145    | 7.9 (-10.1, 25.9)      | 0.39    |
|                   | Day 2    | 44.0 (149.1), 211 | 42.0 (140.0), 188   | 2.0 (-26.6, 30.6)      | 0.89    |
|                   | Day 3    | 39.2 (67.9), 191  | 38.5 (120.5), 178   | 0.7 (-19.1, 20.6)      | 0.94    |
|                   | Day 4    | 46.3 (84.1), 178  | 41.8 (129.2), 164   | 4.6 (-18.5, 27.6)      | 0.70    |
|                   | Day 5    | 45.3 (92.3), 162  | 70.8 (474.5), 146   | -25.5 (-100.4, 49.3)   | 0.50    |
|                   | Day 6    | 46.9 (75.3), 102  | 88.6 (542.7), 95    | -41.7 (-148.7, 65.3)   | 0.44    |
|                   | Day 7    | 36.3 (37.8), 117  | 29.4 (29.2), 98     | 6.9 (-2.3, 16.1)       | 0.14    |
| Bilirubin (mg/dL) | Baseline | 0.9 (0.9), 225    | 0.9 (1.0), 197      | 0.0 (-0.2, 0.2)        | 0.82    |
|                   | Day 1    | 0.9 (1.1), 169    | 0.9 (1.0), 138      | 0.1 (-0.2, 0.3)        | 0.60    |
|                   | Day 2    | 0.8 (1.1), 187    | 0.7 (0.9), 175      | 0.0 (-0.2, 0.2)        | 0.65    |
|                   | Day 3    | 0.7 (0.9), 175    | 0.7 (0.9), 159      | -0.0 (-0.2, 0.2)       | 0.88    |
|                   | Day 4    | 0.7 (1.0), 162    | 0.7 (0.9), 150      | -0.0 (-0.2, 0.2)       | 0.78    |
|                   | Day 5    | 0.7 (0.9), 146    | 0.8 (0.9), 137      | -0.0 (-0.2, 0.2)       | 0.82    |
|                   | Day 6    | 0.7 (0.7), 101    | 0.8 (0.9), 90       | -0.1 (-0.3, 0.2)       | 0.57    |
|                   | Day 7    | 0.7 (0.8), 109    | 0.8 (1.2), 88       | -0.1 (-0.4, 0.2)       | 0.38    |

AST, aspartate aminotransferase; ALT, alanine aminotransferase

\*Mean (SD), N. P-value is calculated from two sample t-test.

eTable 3. Fluid balance (ml) by study day\*

|       | Acetaminophen<br>(N=227) | Placebo<br>(N=220)  | Difference (95%<br>CI) | P-value |
|-------|--------------------------|---------------------|------------------------|---------|
| Day 1 | 612.3 (1616.3), 215      | 732.9 (3370.0), 209 | -120.6 (-622.9, 381.8) | 0.64    |
| Day 2 | 277.3 (1808.5), 174      | 246.9 (1464.2), 172 | 30.4 (-317.8, 378.6)   | 0.86    |
| Day 3 | 125.7 (1705.7), 124      | -8.1 (1535.0), 136  | 133.8 (-262.0, 529.5)  | 0.51    |
| Day 4 | 131.7 (1610.7), 99       | 39.0 (1760.3), 107  | 92.7 (-372.0, 557.4)   | 0.70    |
| Day 5 | -304.4 (1600.5), 81      | -209.4 (1607.6), 92 | -95.0 (-577.5, 387.5)  | 0.70    |
| Day 6 | -154.5 (1563.0), 70      | 57.5 (1098.8), 75   | -212.0 (-653.1, 229.2) | 0.34    |
| Day 7 | -258.4 (1754.8), 53      | 90.1 (1479.6), 62   | -348.5 (-946.0, 248.9) | 0.25    |

\*Mean (SD), N

P-value is calculated from two-sample t-test



eTable 4a. Adverse events by organ system and severity in acetaminophen and matched placebo

| Organ                                               | Severity   | Acetaminophen (N=227) | Placebo (N=199) | Overall (N=426) | P-value |
|-----------------------------------------------------|------------|-----------------------|-----------------|-----------------|---------|
| Blood And Lymphatic System Disorders                | Non-severe | 1 (0.44%)             | 3 (1.51%)       | 4 (0.94%)       | 0.34    |
| Cardiac Disorders                                   | Non-severe | 1 (0.44%)             | 1 (0.5%)        | 2 (0.47%)       | 1.00    |
|                                                     | Severe     | 2 (0.88%)             | 3 (1.51%)       | 5 (1.17%)       | 0.67    |
| Endocrine Disorders                                 | Non-severe | 1 (0.44%)             | 0 (0%)          | 1 (0.23%)       | 1.00    |
| Gastrointestinal Disorders                          | Non-severe | 1 (0.44%)             | 0 (0%)          | 1 (0.23%)       | 1.00    |
|                                                     | Severe     | 1 (0.44%)             | 0 (0%)          | 1 (0.23%)       | 1.00    |
| General Disorders and Administration Site Condition | Non-severe | 0 (0%)                | 1 (0.5%)        | 1 (0.23%)       | 0.47    |
|                                                     | Severe     | 0 (0%)                | 1 (0.5%)        | 1 (0.23%)       | 0.47    |
| Hepatobiliary Disorders                             | Non-severe | 1 (0.44%)             | 0 (0%)          | 1 (0.23%)       | 1.00    |
| Infections And Infestations                         | Non-severe | 0 (0%)                | 1 (0.5%)        | 1 (0.23%)       | 0.47    |
|                                                     | Severe     | 2 (0.88%)             | 1 (0.5%)        | 3 (0.7%)        | 1.00    |
| Investigations                                      | Non-severe | 4 (1.76%)             | 0 (0%)          | 4 (0.94%)       | 0.13    |
|                                                     | Severe     | 8 (3.52%)             | 5 (2.51%)       | 13 (3.05%)      | 0.59    |
| Metabolism And Nutrition Disorders                  | Non-severe | 1 (0.44%)             | 1 (0.5%)        | 2 (0.47%)       | 1.00    |
| Musculoskeletal And Connective Tissue Disorders     | Severe     | 1 (0.44%)             | 0 (0%)          | 1 (0.23%)       | 1.00    |
| Renal And Urinary Disorders                         | Non-severe | 1 (0.44%)             | 0 (0%)          | 1 (0.23%)       | 1.00    |
| Respiratory, Thoracic And Mediastinal Disorders     | Non-severe | 2 (0.88%)             | 1 (0.5%)        | 3 (0.7%)        | 1.00    |
|                                                     | Severe     | 1 (0.44%)             | 3 (1.51%)       | 4 (0.94%)       | 0.34    |

|                                        |            |           |           |            |      |
|----------------------------------------|------------|-----------|-----------|------------|------|
| Skin And Subcutaneous Tissue Disorders | Non-severe | 1 (0.44%) | 0 (0%)    | 1 (0.23%)  | 1.00 |
| Surgical And Medical Procedures        | Non-severe | 1 (0.44%) | 0 (0%)    | 1 (0.23%)  | 1.00 |
| Vascular Disorders                     | Non-severe | 1 (0.44%) | 0 (0%)    | 1 (0.23%)  | 1.00 |
|                                        | Severe     | 5 (2.2%)  | 9 (4.52%) | 14 (3.29%) | 0.28 |
| Any (Total number of events)*          | Non-severe | 16        | 8         | 24         | 0.10 |
|                                        | Severe     | 20        | 24        | 44         | 0.55 |

N (%)

Unit of the analysis is patient except for the total number of events analysis by severity status

\*For the total number of severe/non-severe events, p values are calculated from Poisson regression

Other p values are calculated from Fisher's exact test.

eTable 4b. Listings of all adverse events in acetaminophen group

| Organ                                | Events                                                                  | Severity   | Event Day | Unexpected for Acetaminophen | Related to study procedures? | AE Status When Reported         | Final Outcome                  |
|--------------------------------------|-------------------------------------------------------------------------|------------|-----------|------------------------------|------------------------------|---------------------------------|--------------------------------|
| Blood And Lymphatic System Disorders | Acute Blood Loss Anemia                                                 | Non-severe | 1         | Yes                          | Definitely not related       | AE present, being treated       | Recovered                      |
| Cardiac Disorders                    | Heart Failure (Nos)                                                     | Severe     | 2         | Yes                          | Definitely not related       | AE present, no treatment        | AE present, no treatment       |
|                                      | Paroxysmal Atrial Fibrillation                                          | Non-severe | 1         | Yes                          | Definitely not related       | AE present, being treated       | Recovered                      |
|                                      | Supraventricular Tachycardia                                            | Severe     | 1         | Yes                          | Definitely not related       | Recovered                       | Recovered                      |
| Endocrine Disorders                  | Diabetes Mellitus                                                       | Non-severe | 1         | Yes                          | Probably not related         | AE present, being treated       | AE present, being treated      |
| Gastrointestinal Disorders           | Bowel Obstruction                                                       | Severe     | 3         | Yes                          | Probably not related         | Residual effect / being treated | Recovered                      |
|                                      | Dyspepsia                                                               | Non-severe | 1         | Yes                          | Definitely not related       | AE present, being treated       | Recovered                      |
| Hepatobiliary Disorders              | Hepatocellular Damage                                                   | Non-severe | 3         | No                           | Definitely not related       | Residual effect / no treatment  | Residual effect / no treatment |
| Infections And Infestations          | Sepsis                                                                  | Severe     | 6         | No                           | Definitely not related       | Deceased as a result of the AE  | Deceased as a result of the AE |
|                                      | Ventilator Associated Pneumonia                                         | Severe     | 3         | Yes                          | Definitely not related       | AE present, being treated       | Deceased as a result of the AE |
| Investigations                       | Alanine Aminotransferase Increase, Aspartate Aminotransferase Increased | Non-severe | 7         | No                           | Probably not related         | Recovered                       | Recovered                      |

|                                                                                                                        |                                        |            |    |                      |                              |                                 |                                 |
|------------------------------------------------------------------------------------------------------------------------|----------------------------------------|------------|----|----------------------|------------------------------|---------------------------------|---------------------------------|
|                                                                                                                        | Alt Increased, AST Increased           | Non-severe | 5  | No                   | Probably or possibly related | AE present, being treated       | AE present, being treated       |
|                                                                                                                        | AST Increased                          | Severe     | 1  | No                   | Probably not related         | AE present, being treated       | AE present, no treatment        |
|                                                                                                                        |                                        | Severe     | 3  | No                   | Probably not related         | AE present, being treated       | Recovered                       |
|                                                                                                                        | Elevated LFTs                          | Non-severe | 1  | No                   | Probably or possibly related | Recovered                       | Recovered                       |
|                                                                                                                        | Function Liver Abnormal                | Severe     | 1  | No                   | Definitely not related       | AE present, no treatment        | Recovered                       |
|                                                                                                                        | Hepatic Function Abnormal              | Severe     | 2  | No                   | Probably or possibly related | AE present, being treated       | AE present, no treatment        |
|                                                                                                                        | Liver Enzyme Abnormal                  | Severe     | 4  | No                   | Probably or possibly related | Recovered                       | Recovered                       |
|                                                                                                                        |                                        | Severe     | 1  | No                   | Probably or possibly related | AE present, being treated       | Recovered                       |
|                                                                                                                        | Liver Function Tests Multiple Abnormal | Non-severe | 7  | No                   | Probably not related         | AE present, no treatment        | Recovered                       |
|                                                                                                                        |                                        | Severe     | 4  | Yes                  | Probably or possibly related | AE present, no treatment        | Recovered                       |
| Severe                                                                                                                 |                                        | 0          | No | Probably not related | Recovered                    | Recovered                       |                                 |
| Metabolism And Nutrition Disorders                                                                                     | Hypokalemia                            | Non-severe | 0  | Yes                  | Probably not related         | AE present, being treated       | Recovered                       |
| Musculoskeletal And Connective Tissue Disorders                                                                        | Myopathy                               | Severe     | 9  | Yes                  | Definitely not related       | Residual effect / being treated | Residual effect / being treated |
| Renal And Urinary Disorders                                                                                            | Kidney Failure Acute                   | Non-severe | 0  | Yes                  | Definitely not related       | AE present, no treatment        | AE present, being treated       |
| eTable 4c. Listings of all adverse events in matching placebo group<br>Respiratory, Thoracic And Mediastinal Disorders | Embolism Pulmonary                     | Severe     | 1  | Yes                  | Probably not related         | AE present, being treated       | Recovered                       |
|                                                                                                                        | Hypoxia                                | Non-severe | 3  | Yes                  | Definitely not related       | Residual effect / no treatment  | Residual effect / being treated |

|                                        |                                              |            |   |     |                              |                           |                           |
|----------------------------------------|----------------------------------------------|------------|---|-----|------------------------------|---------------------------|---------------------------|
|                                        | Pneumothorax                                 | Non-severe | 3 | Yes | Definitely not related       | AE present, being treated | AE present, being treated |
| Skin And Subcutaneous Tissue Disorders | Dermatitis Contact                           | Non-severe | 3 | No  | Probably or possibly related | AE present, being treated | AE present, being treated |
| Surgical And Medical Procedures        | Transfer Back To ICU                         | Non-severe | 5 | No  | Definitely not related       | AE present, being treated | Recovered                 |
| Vascular Disorders                     | Acute Bilateral Popliteal Arterial Occlusion | Severe     | 3 | Yes | Definitely not related       | AE present, being treated | AE present, being treated |
|                                        | Hypotension                                  | Non-severe | 2 | No  | Definitely not related       | Recovered                 | Recovered                 |
|                                        |                                              | Severe     | 1 | No  | Probably not related         | AE present, being treated | Recovered                 |
|                                        |                                              | Severe     | 5 | No  | Probably or possibly related | AE present, being treated | AE present, no treatment  |
|                                        | Infarct Cerebral                             | Severe     | 1 | No  | Definitely not related       | AE present, no treatment  | AE present, no treatment  |
|                                        | Shock                                        | Severe     | 5 | Yes | Definitely not related       | AE present, being treated | Recovered                 |

| Organ                                                | Events                  | Severity   | Event Day | Unexpected for Acetaminophen | Related to study procedures? | AE Status When Reported         | Final Outcome                  |
|------------------------------------------------------|-------------------------|------------|-----------|------------------------------|------------------------------|---------------------------------|--------------------------------|
| Blood And Lymphatic System Disorders                 | Anemia                  | Non-severe | 2         | Yes                          | Probably not related         | AE present, being treated       | AE present, being treated      |
|                                                      | Thrombocytopenia        | Non-severe | 1         | No                           | Probably or possibly related | Recovered                       | Recovered                      |
|                                                      |                         | Non-severe | 1         | No                           | Probably not related         | Recovered                       | Recovered                      |
| Cardiac Disorders                                    | Bradycardia             | Non-severe | 0         | Yes                          | Definitely not related       | Recovered                       | Recovered                      |
|                                                      | Cardiac Arrest          | Severe     | 5         | Yes                          | Definitely not related       | Residual effect / being treated | Deceased as a result of the AE |
|                                                      | Cardiogenic Shock       | Severe     | 1         | Yes                          | Definitely not related       | AE present, being treated       | AE present, being treated      |
|                                                      | Cardiomyopathy          | Severe     | 4         | Yes                          | Definitely not related       | Recovered                       | Recovered                      |
|                                                      | Coronary Artery Disease | Severe     | 1         | No                           | Definitely not related       | AE present, being treated       | AE present, being treated      |
| General Disorders And Administration Site Conditions | Edema Left Leg          | Non-severe | 5         | Yes                          | Definitely not related       | Recovered                       | Recovered                      |
|                                                      | Multiple Organ Failure  | Severe     | 9         | Yes                          | Definitely not related       | Deceased as a result of the AE  | Deceased as a result of the AE |
| Infections And Infestations                          | Infection Bacterial     | Non-severe | 8         | Yes                          | Definitely not related       | AE present, being treated       | AE present, being treated      |
|                                                      | Worsening Infection     | Severe     | 1         | Yes                          | Probably not related         | Recovered                       | Recovered                      |

|                                                 |                                                                          |            |    |                      |                              |                                |                                |
|-------------------------------------------------|--------------------------------------------------------------------------|------------|----|----------------------|------------------------------|--------------------------------|--------------------------------|
| Investigations                                  | Alt Increased, AST Increased                                             | Severe     | 7  | No                   | Probably not related         | Deceased as a result of the AE | Deceased as a result of the AE |
|                                                 | Aspartate Aminotransferase Increased, Alanine Aminotransferase Increased | Severe     | 2  | No                   | Probably not related         | AE present, no treatment       | Recovered                      |
|                                                 | AST Increased                                                            | Severe     | 4  | No                   | Probably or possibly related | AE present, being treated      | AE present, no treatment       |
|                                                 | AST Increased; Alt Increased                                             | Severe     | 4  | No                   | Probably not related         | AE present, being treated      | AE present, being treated      |
|                                                 | Hepatic Function Abnormal                                                | Severe     | 1  | No                   | Definitely not related       | AE present, no treatment       | AE present, no treatment       |
| Metabolism And Nutrition Disorders              | Hypokalemia                                                              | Non-severe | 3  | Yes                  | Definitely not related       | Recovered                      | Recovered                      |
| Respiratory, Thoracic And Mediastinal Disorders | Coughing                                                                 | Non-severe | 2  | Yes                  | Definitely not related       | AE present, no treatment       | Recovered                      |
|                                                 | Pneumothorax                                                             | Severe     | 5  | Yes                  | Definitely not related       | Recovered                      | Recovered                      |
|                                                 |                                                                          | Severe     | 1  | Yes                  | Definitely not related       | AE present, being treated      | AE present, being treated      |
|                                                 | Respiratory Failure                                                      | Severe     | 2  | No                   | Definitely not related       | Recovered                      | Recovered                      |
| Vascular Disorders                              | Deep Vein Thrombosis                                                     | Severe     | 4  | Yes                  | Definitely not related       | AE present, being treated      | AE present, no treatment       |
|                                                 | Hypertension                                                             | Severe     | 1  | No                   | Probably not related         | AE present, being treated      | Recovered                      |
|                                                 |                                                                          | Severe     | 3  | No                   | Probably not related         | AE present, being treated      | Recovered                      |
|                                                 | Hypotension                                                              | Severe     | 1  | No                   | Probably or possibly related | AE present, being treated      | AE present, being treated      |
| Severe                                          |                                                                          | 0          | No | Probably not related | AE present, being treated    | Recovered                      |                                |

|  |                                    |        |   |     |                              |                                 |                                |
|--|------------------------------------|--------|---|-----|------------------------------|---------------------------------|--------------------------------|
|  |                                    | Severe | 0 | No  | Probably or possibly related | AE present, being treated       | AE present, being treated      |
|  |                                    | Severe | 0 | No  | Probably not related         | Recovered                       | Recovered                      |
|  | Left MCA Stroke                    | Severe | 1 | Yes | Probably not related         | Residual effect / being treated | Residual effect / no treatment |
|  | Retroperitoneal Hemorrhage Grade 4 | Severe | 5 | Yes | Definitely not related       | Recovered                       | Recovered                      |
|  | Thrombosis Venous Deep             | Severe | 1 | Yes | Definitely not related       | AE present, being treated       | AE present, being treated      |



eTable 5. Comparison of baseline patient characteristics between the higher and lower cell-free hemoglobin groups

| Characteristic                            | Higher Baseline Cell-free Hemoglobin (> 10 mg/dl) |                 |               | Lower baseline Cell-free Hemoglobin (≤ 10 mg/dl) |                  |               |
|-------------------------------------------|---------------------------------------------------|-----------------|---------------|--------------------------------------------------|------------------|---------------|
|                                           | Acetaminophen<br>N=93                             | Placebo<br>N=97 | Overall N=190 | Acetaminophen<br>N=125                           | Placebo<br>N=115 | Overall N=240 |
| Age (yr)                                  | 64.4 (15.6)                                       | 65.5 (15.5)     | 65.0 (15.5)   | 63.3 (16.0)                                      | 63.3 (14.5)      | 63.3 (15.3)   |
| Sex no. (%)                               |                                                   |                 |               |                                                  |                  |               |
| Male                                      | 54 (58.1)                                         | 44 (45.4)       | 98 (51.6)     | 57 (45.6)                                        | 60 (52.2)        | 117 (48.8)    |
| Female                                    | 39 (41.9)                                         | 53 (54.6)       | 92 (48.4)     | 68 (54.4)                                        | 55 (47.8)        | 123 (51.3)    |
| Ethnicity no. (%)                         |                                                   |                 |               |                                                  |                  |               |
| Hispanic or Latino                        | 14 (15.1)                                         | 12 (12.4)       | 26 (13.7)     | 17 (13.6)                                        | 15 (13.0)        | 32 (13.3)     |
| Not Hispanic or Latino                    | 79 (84.9)                                         | 83 (85.6)       | 162 (85.3)    | 103 (82.4)                                       | 96 (83.5)        | 199 (82.9)    |
| Not reported                              | 0 (0.0)                                           | 2 (2.1)         | 2 (1.1)       | 5 (4.0)                                          | 4 (3.5)          | 9 (3.8)       |
| Race no. (%)                              |                                                   |                 |               |                                                  |                  |               |
| White                                     | 64 (68.8)                                         | 66 (68.0)       | 130 (68.4)    | 81 (64.8)                                        | 76 (66.1)        | 157 (65.4)    |
| Black                                     | 16 (17.2)                                         | 15 (15.5)       | 31 (16.3)     | 28 (22.4)                                        | 16 (13.9)        | 44 (18.3)     |
| Asian                                     | 1 (1.1)                                           | 3 (3.1)         | 4 (2.1)       | 5 (4.0)                                          | 9 (7.8)          | 14 (5.8)      |
| American Indian or Alaskan Native         | 0 (0.0)                                           | 0 (0.0)         | 0 (0.0)       | 2 (1.6)                                          | 0 (0.0)          | 2 (0.8)       |
| Native Hawaiian or other Pacific Islander | 1 (1.1)                                           | 1 (1.0)         | 2 (1.1)       | 3 (2.4)                                          | 2 (1.7)          | 5 (2.1)       |
| Not reported                              | 11 (11.8)                                         | 12 (12.4)       | 23 (12.1)     | 6 (4.8)                                          | 12 (10.4)        | 18 (7.5)      |
| BMI (kg/m <sup>2</sup> )                  | 28.6 (8.1)                                        | 28.7 (10.0)     | 28.7 (9.1)    | 30.0 (11.5)                                      | 29.2 (8.8)       | 29.6 (10.3)   |
| Vasopressors at baseline no. (%)          | 62 (66.7)                                         | 73 (75.3)       | 135 (71.1)    | 105 (84.0)                                       | 89 (77.4)        | 194 (80.8)    |

| Characteristic                                               | Higher Baseline Cell-free Hemoglobin (> 10 mg/dl) |                 |                 | Lower baseline Cell-free Hemoglobin (≤ 10 mg/dl) |                  |                |
|--------------------------------------------------------------|---------------------------------------------------|-----------------|-----------------|--------------------------------------------------|------------------|----------------|
|                                                              | Acetaminophen<br>N=93                             | Placebo<br>N=97 | Overall N=190   | Acetaminophen<br>N=125                           | Placebo<br>N=115 | Overall N=240  |
| Assisted ventilation at baseline no. /total no. (%)          | 42/93 (45.2)                                      | 40/96 (41.7)    | 82/189 (43.4)   | 56/125 (44.8)                                    | 45/115 (39.1)    | 101/240 (42.1) |
| HFNO at baseline no. /total no. (%)                          | 19/93 (20.4)                                      | 14/96 (14.6)    | 33/189 (17.5)   | 12/125 (9.6)                                     | 22/115 (19.1)    | 34/240 (14.2)  |
| ARDS at baseline no. /total no. (%)                          | 19/93 (20.4)                                      | 15/96 (15.6)    | 34/189 (18.0)   | 22/125 (17.6)                                    | 13/115 (11.3)    | 35/240 (14.6)  |
| Time from inclusion to randomization (hours), Median (q1-q3) | 10.7 (5.8-20.9)                                   | 9.2 (2.1-18.4)  | 10.1 (2.9-18.9) | 8.6 (1.8-19.0)                                   | 11.3 (4.1-20.2)  | 9.5 (2.6-19.7) |
| Screening hospital location no. (%)                          |                                                   |                 |                 |                                                  |                  |                |
| ED                                                           | 48 (51.6)                                         | 41 (42.3)       | 89 (46.8)       | 42 (33.6)                                        | 38 (33.0)        | 80 (33.3)      |
| ICU                                                          | 43 (46.2)                                         | 55 (56.7)       | 98 (51.6)       | 81 (64.8)                                        | 76 (66.1)        | 157 (65.4)     |
| Hospital floor                                               | 2 (2.2)                                           | 0 (0.0)         | 2 (1.1)         | 0 (0.0)                                          | 0 (0.0)          | 0 (0.0)        |
| Stepdown/intermediate unit                                   | 0 (0.0)                                           | 1 (1.0)         | 1 (0.5)         | 0 (0.0)                                          | 0 (0.0)          | 0 (0.0)        |
| Other                                                        | 0 (0.0)                                           | 0 (0.0)         | 0 (0.0)         | 2 (1.6)                                          | 1 (0.9)          | 3 (1.3)        |
| Site of infection no. (%)                                    |                                                   |                 |                 |                                                  |                  |                |
| Pneumonia                                                    | 50 (53.8)                                         | 41 (42.3)       | 91 (47.9)       | 45 (36.0)                                        | 51 (44.3)        | 96 (40.0)      |
| Urinary tract infection                                      | 15 (16.1)                                         | 28 (28.9)       | 43 (22.6)       | 21 (16.8)                                        | 24 (20.9)        | 45 (18.8)      |
| Intra-abdominal infection                                    | 10 (10.8)                                         | 7 (7.2)         | 17 (8.9)        | 14 (11.2)                                        | 9 (7.8)          | 23 (9.6)       |

| Characteristic                                                 | Higher Baseline Cell-free Hemoglobin (> 10 mg/dl) |                 |               | Lower baseline Cell-free Hemoglobin (≤ 10 mg/dl) |                  |               |
|----------------------------------------------------------------|---------------------------------------------------|-----------------|---------------|--------------------------------------------------|------------------|---------------|
|                                                                | Acetaminophen<br>N=93                             | Placebo<br>N=97 | Overall N=190 | Acetaminophen<br>N=125                           | Placebo<br>N=115 | Overall N=240 |
| Skin or soft-tissue infection                                  | 5 (5.4)                                           | 4 (4.1)         | 9 (4.7)       | 12 (9.6)                                         | 12 (10.4)        | 24 (10.0)     |
| Vascular catheter- related infection                           | 0 (0.0)                                           | 1 (1.0)         | 1 (0.5)       | 0 (0.0)                                          | 1 (0.9)          | 1 (0.4)       |
| Central nervous system infection                               | 1 (1.1)                                           | 2 (2.1)         | 3 (1.6)       | 1 (0.8)                                          | 2 (1.7)          | 3 (1.3)       |
| Endocarditis or endovascular infection                         | 0 (0.0)                                           | 1 (1.0)         | 1 (0.5)       | 1 (0.8)                                          | 0 (0.0)          | 1 (0.4)       |
| Flu/other virus confirmed by testing                           | 4 (4.3)                                           | 1 (1.0)         | 5 (2.6)       | 4 (3.2)                                          | 2 (1.7)          | 6 (2.5)       |
| Other source of infection                                      | 4 (4.3)                                           | 4 (4.1)         | 8 (4.2)       | 10 (8.0)                                         | 2 (1.7)          | 12 (5.0)      |
| Unknown                                                        | 4 (4.3)                                           | 8 (8.2)         | 12 (6.3)      | 17 (13.6)                                        | 12 (10.4)        | 29 (12.1)     |
| COVID-19 status in 3 weeks prior to admission no. (%)          |                                                   |                 |               |                                                  |                  |               |
| Positive test within 3 weeks prior to admission                | 8 (8.6)                                           | 11 (11.3)       | 19 (10.0)     | 9 (7.2)                                          | 11 (9.6)         | 20 (8.3)      |
| Negative (only negative tests with 3 weeks prior to admission) | 69 (74.2)                                         | 71 (73.2)       | 140 (73.7)    | 86 (68.8)                                        | 91 (79.1)        | 177 (73.8)    |
| Unknown (no test within 3 weeks prior to admission)            | 16 (17.2)                                         | 15 (15.5)       | 31 (16.3)     | 30 (24.0)                                        | 13 (11.3)        | 43 (17.9)     |

| Characteristic                                                        | Higher Baseline Cell-free Hemoglobin (> 10 mg/dl) |                 |               | Lower baseline Cell-free Hemoglobin (≤ 10 mg/dl) |                  |               |
|-----------------------------------------------------------------------|---------------------------------------------------|-----------------|---------------|--------------------------------------------------|------------------|---------------|
|                                                                       | Acetaminophen<br>N=93                             | Placebo<br>N=97 | Overall N=190 | Acetaminophen<br>N=125                           | Placebo<br>N=115 | Overall N=240 |
| Baseline creatinine (mg/dL)                                           | 1.6 (1.1)                                         | 1.6 (1.2)       | 1.6 (1.2)     | 1.6 (1.2)                                        | 1.8 (1.4)        | 1.7 (1.3)     |
| Baseline outpatient creatinine in 365 days prior to admission (mg/d)* | 1.1 (0.9)                                         | 1.2 (1.1)       | 1.2 (1.0)     | 1.1 (0.8)                                        | 1.3 (1.0)        | 1.2 (0.9)     |
| Baseline AST (U/L)                                                    | 40.7 (31.9)                                       | 41.5 (42.0)     | 41.1 (37.3)   | 49.6 (37.5)                                      | 41.0 (32.2)      | 45.5 (35.3)   |
| Baseline ALT (U/L)                                                    | 28.9 (25.0)                                       | 31.3 (36.7)     | 30.1 (31.4)   | 32.5 (27.7)                                      | 31.6 (33.2)      | 32.1 (30.4)   |
| Baseline bilirubin (mg/dL)                                            | 0.9 (0.7)                                         | 0.9 (1.2)       | 0.9 (1.0)     | 1.0 (1.0)                                        | 0.9 (1.0)        | 1.0 (1.0)     |
| Baseline platelets (×1000/mm <sup>3</sup> )                           | 206.1 (115.1)                                     | 228.6 (140.4)   | 217.6 (128.8) | 225.0 (134.0)                                    | 215.7 (126.8)    | 220.5 (130.5) |
| Baseline total SOFA score (excludes GCS)                              | 5.2 (2.5)                                         | 5.1 (2.5)       | 5.2 (2.5)     | 5.7 (2.5)                                        | 5.3 (2.5)        | 5.5 (2.5)     |
| Baseline Plasma cell-free hemoglobin (mg/dL)                          | 49.7 (86.1)                                       | 44.9 (91.5)     | 47.3 (88.7)   | 5.1 (2.3)                                        | 5.0 (2.3)        | 5.1 (2.3)     |
| Baseline Acetaminophen no. (%)                                        | 54 (58.1)                                         | 41 (42.3)       | 95 (50.0)     | 49 (39.2)                                        | 47 (40.9)        | 96 (40.0)     |

Data as mean (SD) or N (%) unless otherwise indicated. BMI, body mass index; HFNO, high flow nasal oxygen; ARDS, acute respiratory distress syndrome; ED, emergency department; ICU, intensive care unit; COVID-19, coronavirus-associated infectious disease 2019; AST, aspartate aminotransferase; ALT, alanine aminotransferase; SOFA, sequential organ failure assessment; ranges 0-20; 20 is most severe; GCS, Glasgow coma score.

\*Available 66 and 63 in higher cell-free Hb Acetaminophen and Placebo, 90 and 88 in lower cell-free Hb Acetaminophen and Placebo

eTable 6. Secondary outcomes by treatment in higher (>10 mg/dl) and lower (≤10 mg/dl) baseline cell-free hemoglobin level groups

| Outcome* †                                       | Baseline Cell-free Hemoglobin | Acetaminophen (N=218) |                   | Placebo (N=212) |                   | Acetaminophen vs. Placebo |         | High vs Low Baseline Cell- free Hemoglobin (Difference in difference) |                     |
|--------------------------------------------------|-------------------------------|-----------------------|-------------------|-----------------|-------------------|---------------------------|---------|-----------------------------------------------------------------------|---------------------|
|                                                  |                               | N                     | Mean (95% CI)     | N               | Mean (95% CI)     | Difference (95% CI)       | P-value | Difference (95% CI)                                                   | Interaction P-value |
| Ventilator free days to day 28                   | High                          | 92                    | 22.3 (20.0, 24.7) | 96              | 19.7 (17.4, 22.0) | 2.6 (-0.6, 5.9)           | 0.12    | 1.8 (-2.6, 6.2)                                                       | 0.42                |
|                                                  | Low                           | 124                   | 19.7 (17.7, 21.8) | 115             | 18.9 (16.8, 21.0) | 0.8 (-2.1, 3.7)           | 0.58    |                                                                       |                     |
| Vasopressor free days to day 28                  | High                          | 92                    | 23.0 (20.8, 25.3) | 96              | 20.1 (17.9, 22.3) | 3.0 (-0.2, 6.1)           | 0.06    | 2.1 (-2.1, 6.3)                                                       | 0.33                |
|                                                  | Low                           | 124                   | 20.3 (18.4, 22.3) | 115             | 19.4 (17.4, 21.4) | 0.9 (-1.9, 3.7)           | 0.53    |                                                                       |                     |
| New renal replacement therapy to day 28          | High                          | 92                    | 23.7 (21.4, 26.0) | 96              | 22.1 (19.8, 24.4) | 1.6 (-1.7, 4.9)           | 0.34    | 0.9 (-3.5, 5.2)                                                       | 0.70                |
|                                                  | Low                           | 124                   | 21.4 (19.4, 23.4) | 115             | 20.6 (18.5, 22.7) | 0.7 (-2.2, 3.6)           | 0.62    |                                                                       |                     |
| 28-day hospital mortality – %                    | High                          | 93                    | 10.8 (4.5, 17.0)  | 96              | 20.8 (12.7, 29.0) | -10.1 (-20.4, 0.2)        | 0.06    | -7.6 (-22.3, 7.2)                                                     | 0.31                |
|                                                  | Low                           | 124                   | 21.0 (13.8, 28.1) | 115             | 23.5 (15.7, 31.2) | -2.5 (-13.1, 8.0)         | 0.64    |                                                                       |                     |
| ICU free days to day 28                          | High                          | 92                    | 20.5 (18.4, 22.5) | 96              | 18.9 (16.8, 20.9) | 1.6 (-1.3, 4.5)           | 0.27    | 1.9 (-1.9, 5.7)                                                       | 0.33                |
|                                                  | Low                           | 124                   | 18.6 (16.8, 20.3) | 115             | 18.8 (17.0, 20.7) | -0.3 (-2.8, 2.3)          | 0.83    |                                                                       |                     |
| Hospital free days to day 28                     | High                          | 92                    | 13.5 (11.3, 15.7) | 96              | 11.2 (9.0, 13.3)  | 2.4 (-0.7, 5.5)           | 0.13    | 3.1 (-1.0, 7.3)                                                       | 0.14                |
|                                                  | Low                           | 124                   | 10.0 (8.1, 11.9)  | 115             | 10.8 (8.8, 12.7)  | -0.8 (-3.5, 2.0)          | 0.59    |                                                                       |                     |
| ICU days to day 28                               | High                          | 92                    | 5.3 (4.0, 6.6)    | 96              | 5.1 (3.9, 6.4)    | 0.1 (-1.6, 1.9)           | 0.87    | -0.2 (-2.5, 2.2)                                                      | 0.89                |
|                                                  | Low                           | 123                   | 5.3 (4.2, 6.4)    | 114             | 5.0 (3.9, 6.1)    | 0.3 (-1.3, 1.9)           | 0.70    |                                                                       |                     |
| Initiation of assisted ventilation to day 28 – % | High                          | 50                    | 8.0 (0.5, 15.5)   | 56              | 23.2 (12.2, 34.3) | -15.2 (-28.6, -1.8)       | 0.03    | -22.6 (-40.8, -4.5)                                                   | 0.02                |
|                                                  | Low                           | 69                    | 20.3 (10.8, 29.8) | 70              | 12.9 (5.0, 20.7)  | 7.4 (-4.9, 19.7)          | 0.24    |                                                                       |                     |
|                                                  | High                          | 92                    | 12.0 (5.3, 18.6)  | 96              | 7.3 (2.1, 12.5)   | 4.7 (-3.8, 13.1)          | 0.28    | 6.2 (-4.9, 17.3)                                                      | 0.28                |

|                                                                                                                           |      |     |                   |     |                   |                    |      |                    |      |
|---------------------------------------------------------------------------------------------------------------------------|------|-----|-------------------|-----|-------------------|--------------------|------|--------------------|------|
| Initiation of renal replacement therapy to day 28 – %                                                                     | Low  | 124 | 8.1 (3.3, 12.9)   | 115 | 9.6 (4.2, 14.9)   | -1.5 (-8.7, 5.7)   | 0.68 |                    |      |
| Change in SOFA score from baseline to day 7                                                                               | High | 61  | -3.2 (-4.0, -2.4) | 66  | -2.5 (-3.3, -1.8) | -0.7 (-1.7, 0.4)   | 0.25 | -0.7 (-2.1, 0.8)   | 0.37 |
|                                                                                                                           | Low  | 81  | -3.3 (-3.9, -2.6) | 81  | -3.3 (-4.0, -2.6) | 0.0 (-1.0, 1.0)    | 0.98 |                    |      |
| 90-day hospital mortality – %                                                                                             | High | 93  | 16.1 (8.7, 23.6)  | 96  | 25.0 (16.3, 33.7) | -8.9 (-20.3, 2.6)  | 0.13 | -9.5 (-25.4, 6.5)  | 0.24 |
|                                                                                                                           | Low  | 124 | 25.8 (18.1, 33.5) | 115 | 25.2 (17.3, 33.2) | 0.6 (-10.5, 11.6)  | 0.92 |                    |      |
| Development of ARDS within 7 Days of Randomization – %                                                                    | High | 74  | 2.7 (-1.0, 6.4)   | 81  | 8.6 (2.5, 14.8)   | -5.9 (-13.1, 1.2)  | 0.10 | 0.9 (-8.5, 10.3)   | 0.85 |
|                                                                                                                           | Low  | 102 | 2.0 (-0.7, 4.7)   | 102 | 8.8 (3.3, 14.3)   | -6.9 (-13.0, -0.7) | 0.03 |                    |      |
| Change in serum creatinine from enrollment to discharge, death, initiation of dialysis or 28 days, whichever occurs first | High | 79  | -0.2 (-0.4, 0.0)  | 89  | -0.2 (-0.4, -0.0) | 0.0 (-0.2, 0.3)    | 0.74 | 0.1 (-0.2, 0.5)    | 0.53 |
|                                                                                                                           | Low  | 113 | -0.3 (-0.5, -0.1) | 104 | -0.2 (-0.4, -0.0) | -0.1 (-0.3, 0.2)   | 0.57 |                    |      |
| 90-day all-cause all-location mortality– %                                                                                | High | 92  | 21.7 (13.3, 30.2) | 96  | 30.2 (21.0, 39.4) | -8.5 (-20.9, 4.0)  | 0.18 | -4.5 (-21.6, 12.5) | 0.60 |
|                                                                                                                           | Low  | 124 | 28.2 (20.3, 36.1) | 115 | 32.2 (23.6, 40.7) | -3.9 (-15.6, 7.7)  | 0.51 |                    |      |

\* Unless otherwise indicated, values are mean (95% Confidence intervals)

† The percentage and mean were calculated from the non-missing records.

### III. Supplemental Figures

**eFigure 1.** Change in individual component Sequential Organ Failure Assessment (SOFA) scores from enrollment to day 7 by treatment arm.

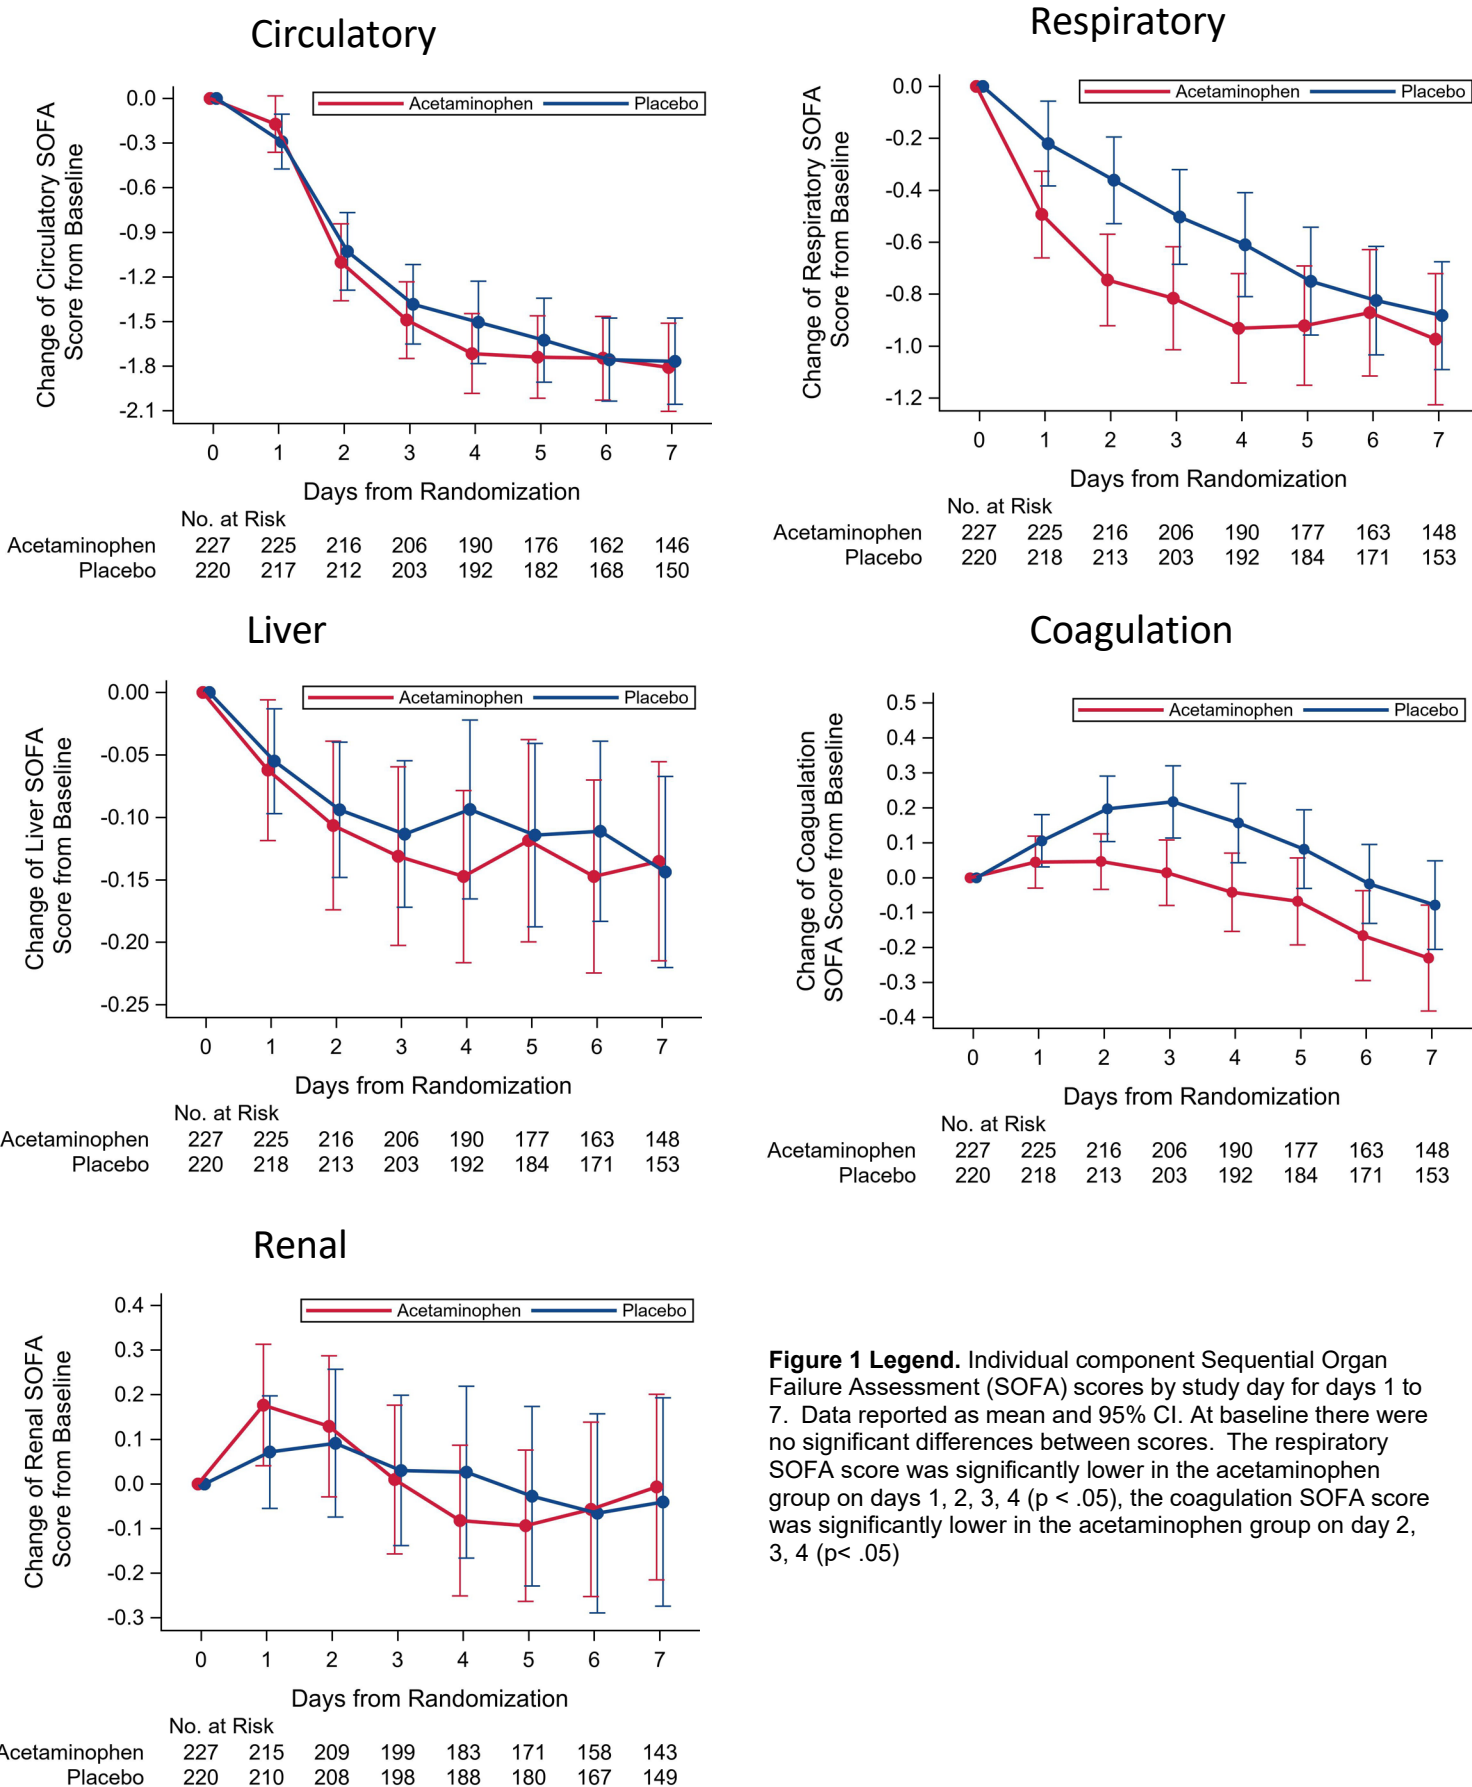

**Figure 1 Legend.** Individual component Sequential Organ Failure Assessment (SOFA) scores by study day for days 1 to 7. Data reported as mean and 95% CI. At baseline there were no significant differences between scores. The respiratory SOFA score was significantly lower in the acetaminophen group on days 1, 2, 3, 4 ( $p < .05$ ), the coagulation SOFA score was significantly lower in the acetaminophen group on day 2, 3, 4 ( $p < .05$ ).

**eFigure 2a.** Total and component SOFA scores from enrollment to Day 7 by treatment arm in the higher cell-free hemoglobin group (>10 mg/dL).

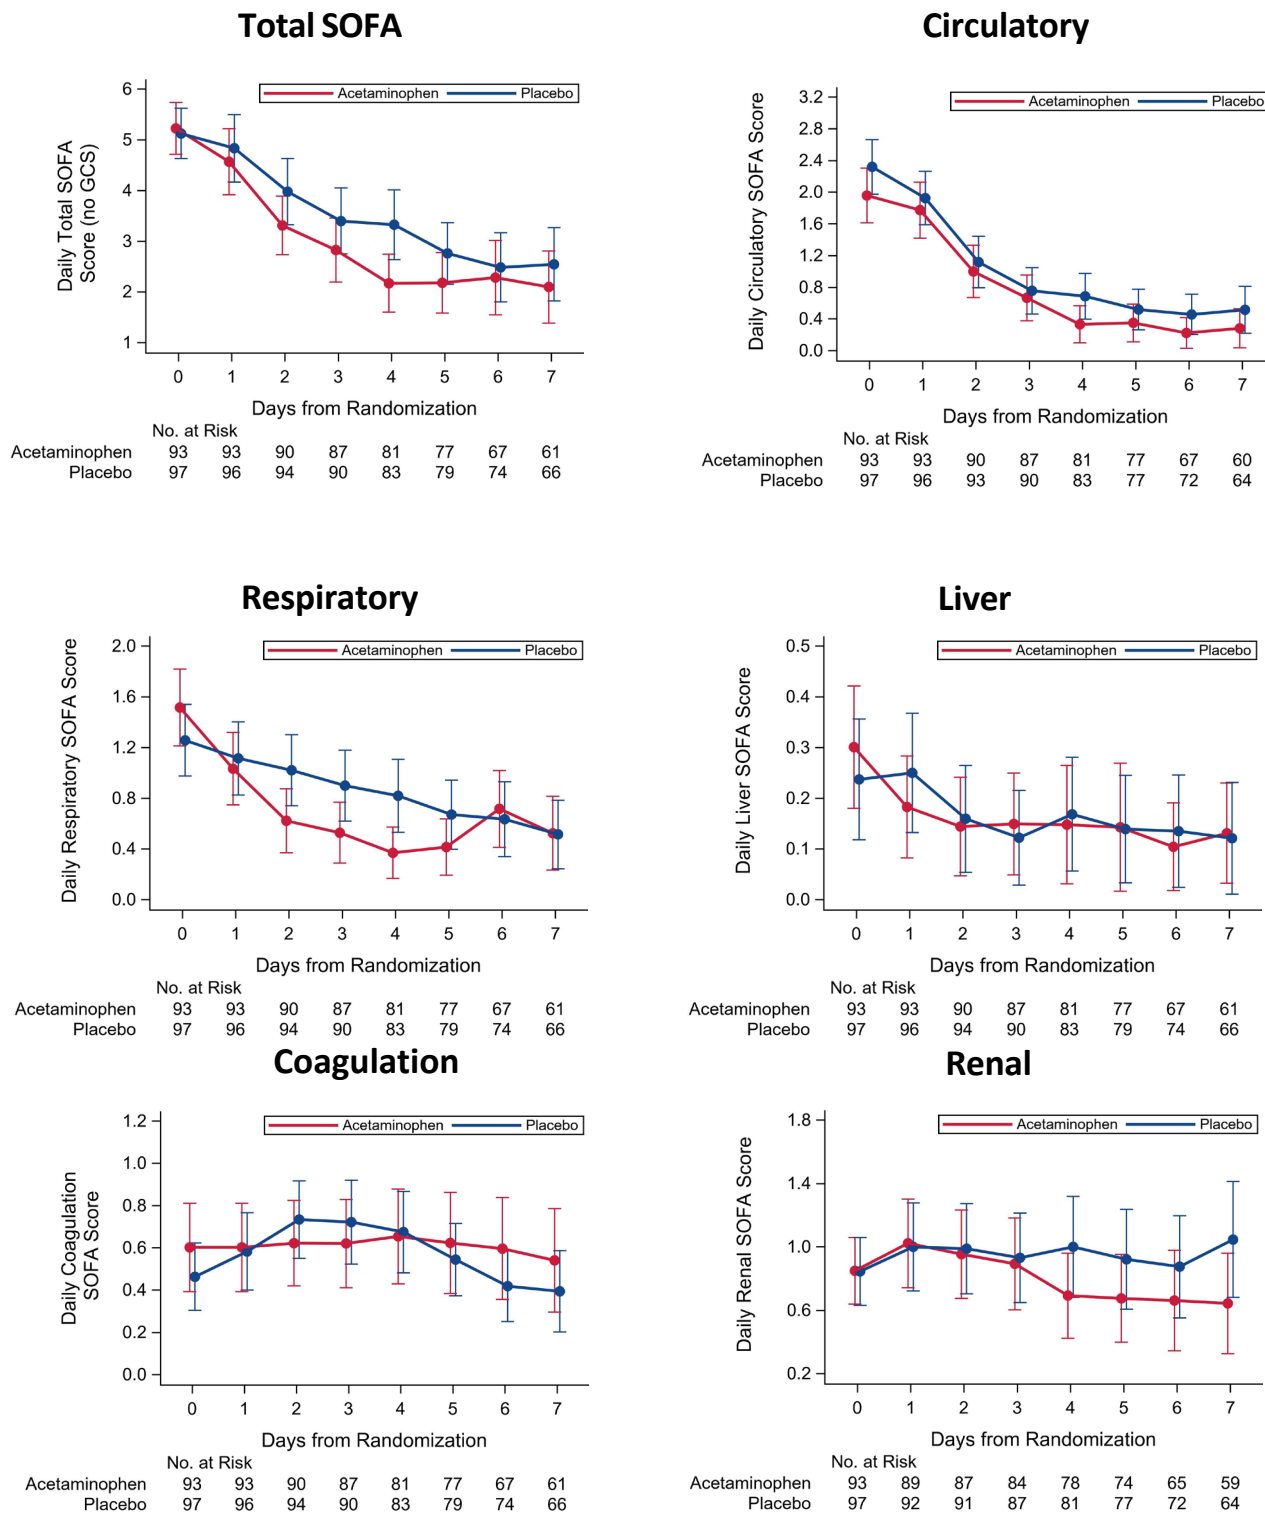



**eFigure 2b.** Total and component SOFA scores from enrollment to Day 7 by treatment arm in the lower cell-free hemoglobin group ( $\leq 10$  mg/dL).

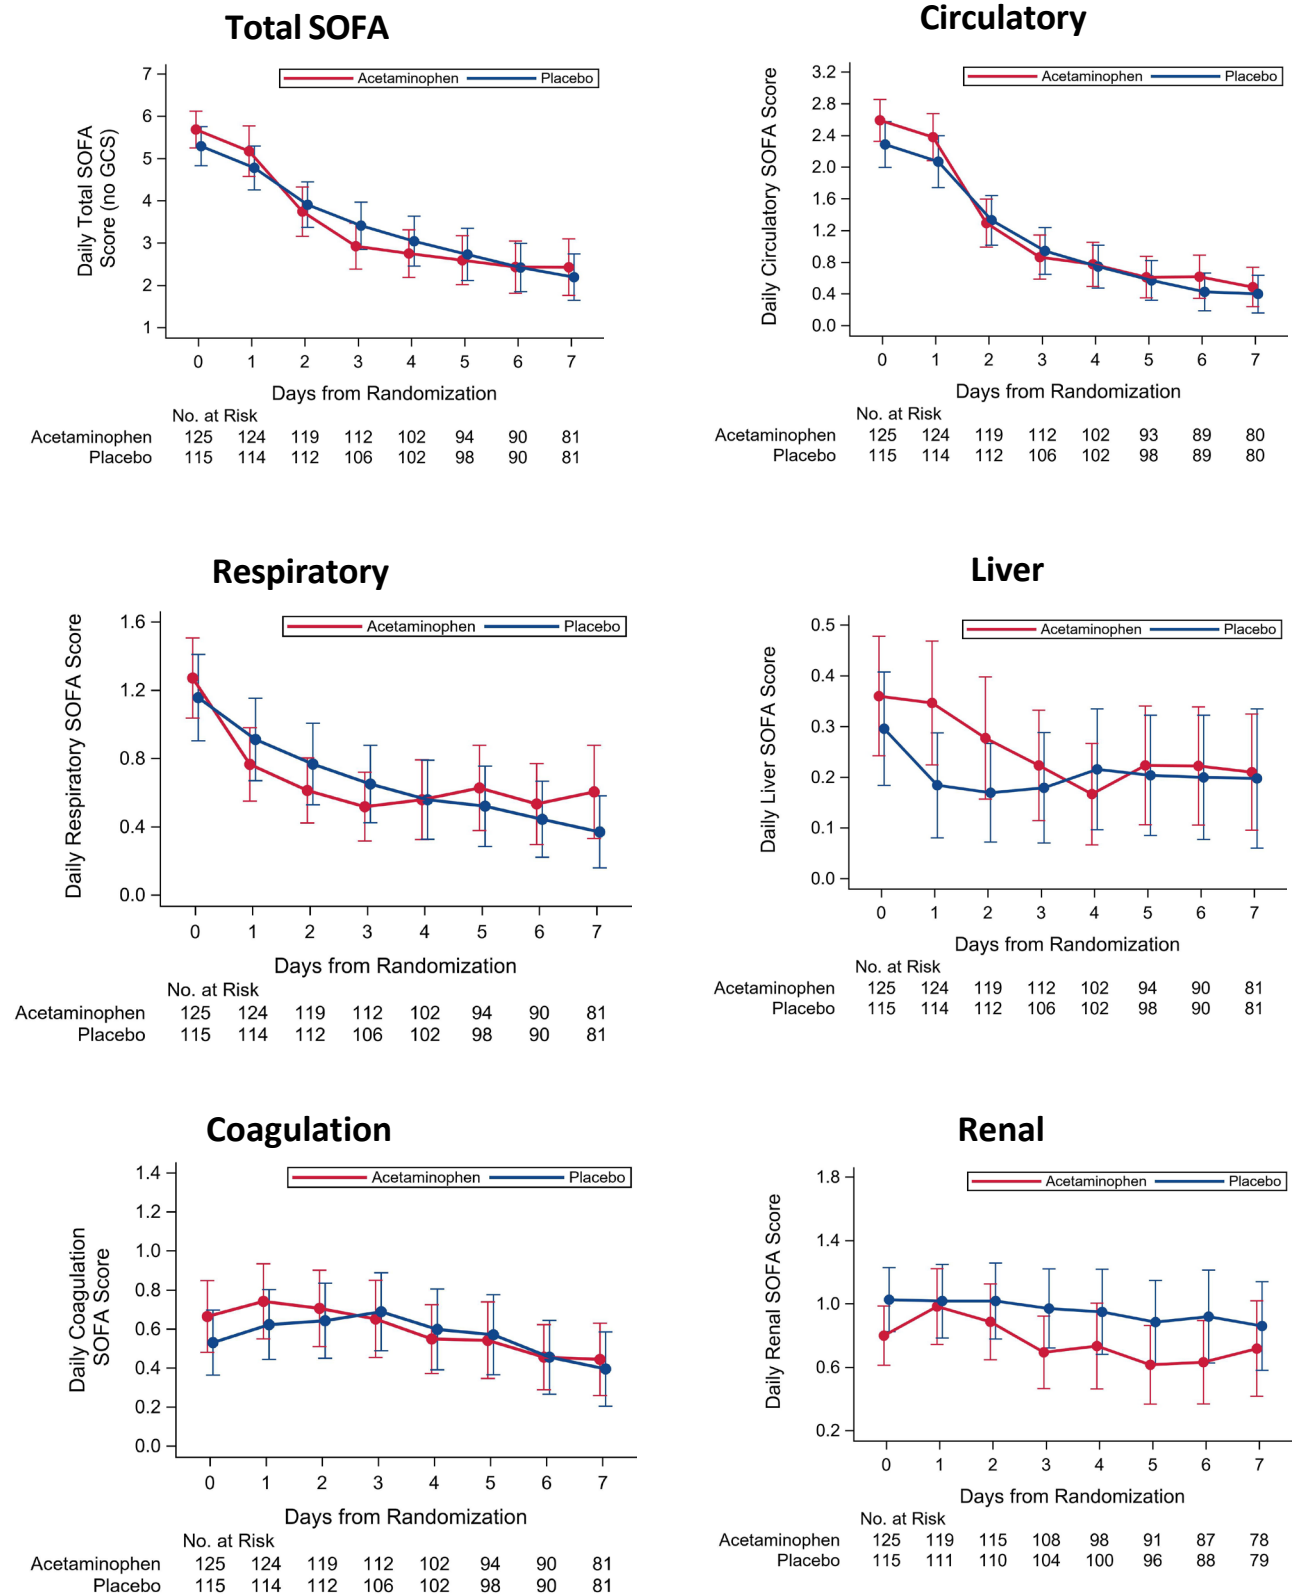

**Figure 2a, b Legend.** Total and individual component Sequential Organ Failure Assessment (SOFA) scores by study day for days 1 to 7 for the higher ( $> 10$  mg/dL, Panel A) and lower ( $\leq 10$  mg/dL, Panel B) baseline cell-free hemoglobin (Hb) groups. Data reported as mean and 95% CI. At baseline there were no significant differences between scores. In the higher hemoglobin group, the respiratory SOFA score was significantly lower in the acetaminophen group on days 2, 3, 4 ( $p < .05$ ) and in the low hemoglobin group, the liver SOFA score was significantly higher in the acetaminophen group on day 1.

**eFigure 3a.** 28-day all-cause Mortality Categorized by Cell-Free Hemoglobin Level

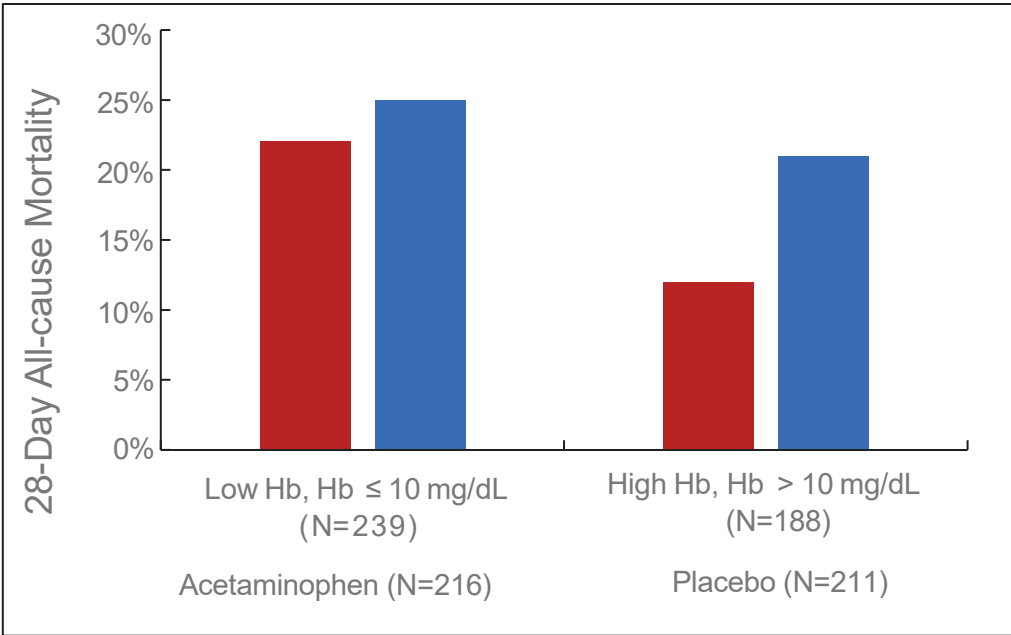

P-values given by Wald Chi-squared test. P value=0.10 in patients with High-Hb level; P value=0.53 in patients with low-Hb level. No interaction between study treatment and Hb level (P=0.48)

**eFigure 3b.** Non-linear relationship between cell-free hemoglobin and 28-day all- cause Mortality by treatment arm

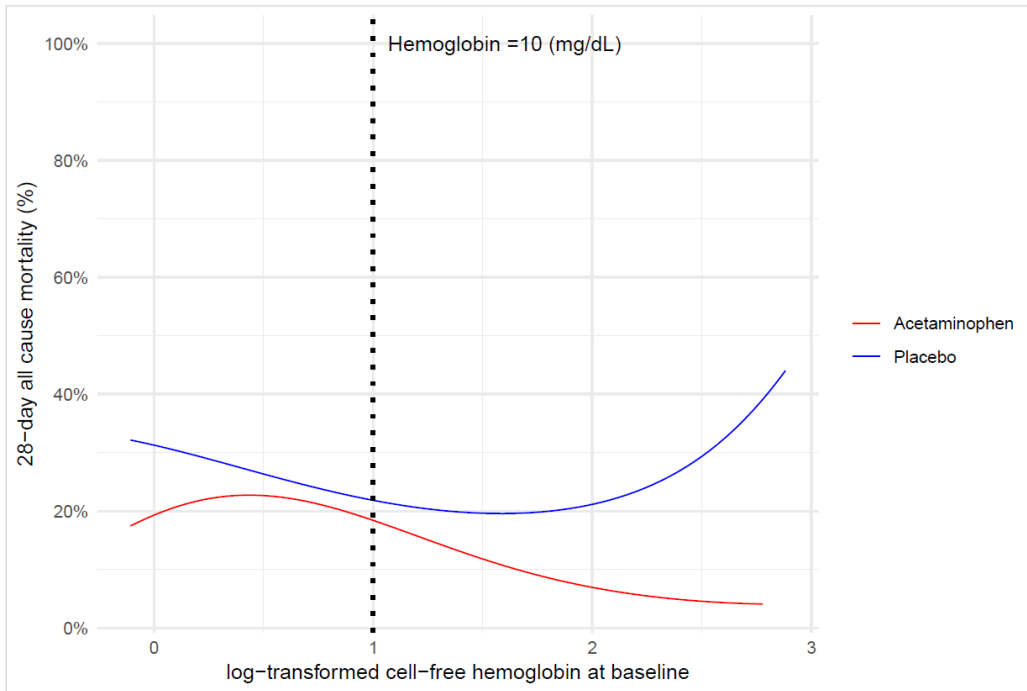

**Figure 3 legend. Panel A.** Comparison of 28-day all-cause mortality in the acetaminophen and placebo groups for the higher and lower baseline cell-free hemoglobin groups. The higher cell-free hemoglobin group had baseline levels > 10 mg/dl. The lower cell-free hemoglobin group had baseline levels  $\leq$  10 mg/dl. P value for interaction 0.48. **Panel B.** Non-linear relationship between baseline cell-free hemoglobin and 28-day all-cause mortality by treatment arm.
