# Supplementary material
Source: PubMed Central journal article supplement (PMC11304120)
Supplement: jama-e248772-s003.pdf [file jama-e248772-s003.pdf]

\*First name, last name, and suffix (if applicable) are required and will appear in PubMed.

| <b>*Group Name(s): The National Heart, Lung, and Blood Institute Prevention and Early Treatment of Acute Lung Injury Clinical Trials Network</b> |                   |                              |                         |                    |                                                 |                                                                |                                                                                                   |
|--------------------------------------------------------------------------------------------------------------------------------------------------|-------------------|------------------------------|-------------------------|--------------------|-------------------------------------------------|----------------------------------------------------------------|---------------------------------------------------------------------------------------------------|
| <b>*First Name and Middle Initial(s)</b>                                                                                                         | <b>*Last Name</b> | <b>*Suffix (eg, Jr, III)</b> | <b>Academic Degrees</b> | <b>Institution</b> | <b>Location (city, state/province, country)</b> | <b>Role or Contribution, eg, chair, principal investigator</b> | <b>Group (if more than 1 Group listed in the byline) and/or Subgroup (eg, Steering Committee)</b> |
| Jay S.                                                                                                                                           | Steingrub         |                              |                         |                    |                                                 |                                                                |                                                                                                   |
| Howard                                                                                                                                           | Smithline         |                              |                         |                    |                                                 |                                                                |                                                                                                   |
| Mark                                                                                                                                             | Tidswell          |                              |                         |                    |                                                 |                                                                |                                                                                                   |
| Lori                                                                                                                                             | Kozikowski        |                              |                         |                    |                                                 |                                                                |                                                                                                   |
| Sherell                                                                                                                                          | Thorton-Thompson  |                              |                         |                    |                                                 |                                                                |                                                                                                   |
| Lesley                                                                                                                                           | DeSouza           |                              |                         |                    |                                                 |                                                                |                                                                                                   |
| Cynthia                                                                                                                                          | Kardos            |                              |                         |                    |                                                 |                                                                |                                                                                                   |
| Sarah                                                                                                                                            | Romain            |                              |                         |                    |                                                 |                                                                |                                                                                                   |
| Scott                                                                                                                                            | Oullette          |                              |                         |                    |                                                 |                                                                |                                                                                                   |
| Peter                                                                                                                                            | Hou               |                              |                         |                    |                                                 |                                                                |                                                                                                   |
| Rebecca M.                                                                                                                                       | Baron             |                              |                         |                    |                                                 |                                                                |                                                                                                   |
| Christopher                                                                                                                                      | Hansen            |                              |                         |                    |                                                 |                                                                |                                                                                                   |
| Victor                                                                                                                                           | Pinto Plata       |                              |                         |                    |                                                 |                                                                |                                                                                                   |
| Yuxiu                                                                                                                                            | Lei               |                              |                         |                    |                                                 |                                                                |                                                                                                   |
| Richard                                                                                                                                          | Riker             |                              |                         |                    |                                                 |                                                                |                                                                                                   |
| Christine                                                                                                                                        | Lord              |                              |                         |                    |                                                 |                                                                |                                                                                                   |
| Meghan                                                                                                                                           | Searight          |                              |                         |                    |                                                 |                                                                |                                                                                                   |
| Nathan I.                                                                                                                                        | Shapiro           |                              |                         |                    |                                                 |                                                                |                                                                                                   |
| Daniel                                                                                                                                           | Talmor            |                              |                         |                    |                                                 |                                                                |                                                                                                   |
| Valerie                                                                                                                                          | Goodspeed         |                              |                         |                    |                                                 |                                                                |                                                                                                   |
| Bryan                                                                                                                                            | Stenson           |                              |                         |                    |                                                 |                                                                |                                                                                                   |
| Joshua                                                                                                                                           | Ellis             |                              |                         |                    |                                                 |                                                                |                                                                                                   |
| Alon                                                                                                                                             | Dagan             |                              |                         |                    |                                                 |                                                                |                                                                                                   |
| Tatyana                                                                                                                                          | Shilvkina         |                              |                         |                    |                                                 |                                                                |                                                                                                   |
| Rupinder                                                                                                                                         | Sekhon            |                              |                         |                    |                                                 |                                                                |                                                                                                   |
| Carlo                                                                                                                                            | Ottanelli         |                              |                         |                    |                                                 |                                                                |                                                                                                   |
| Ana                                                                                                                                              | Grafals           |                              |                         |                    |                                                 |                                                                |                                                                                                   |
| Kim                                                                                                                                              | Redman            |                              |                         |                    |                                                 |                                                                |                                                                                                   |
| Madhavan                                                                                                                                         | Das               |                              |                         |                    |                                                 |                                                                |                                                                                                   |
| Nadim                                                                                                                                            | Kattouf           |                              |                         |                    |                                                 |                                                                |                                                                                                   |
| Alessio                                                                                                                                          | Barca             |                              |                         |                    |                                                 |                                                                |                                                                                                   |
| Alexander                                                                                                                                        | Weingart          |                              |                         |                    |                                                 |                                                                |                                                                                                   |
| Michael R.                                                                                                                                       | Filbin            |                              |                         |                    |                                                 |                                                                |                                                                                                   |
| Kathryn                                                                                                                                          | Hibbert           |                              |                         |                    |                                                 |                                                                |                                                                                                   |

## Supplemental Online Content: Nonauthor Collaborators

\*First name, last name, and suffix (if applicable) are required and will appear in PubMed.

| *First Name and Middle Initial(s) | *Last Name  | *Suffix (eg, Jr, III) | Academic Degrees | Institution | Location (city, state/province, country) | Role or Contribution, eg, chair, principal investigator | Group (if more than 1 Group listed in the byline) and/or Subgroup (eg, Steering Committee) |
|-----------------------------------|-------------|-----------------------|------------------|-------------|------------------------------------------|---------------------------------------------------------|--------------------------------------------------------------------------------------------|
| Blair Alden                       | Parry       |                       |                  |             |                                          |                                                         |                                                                                            |
| Justin                            | Margolin    |                       |                  |             |                                          |                                                         |                                                                                            |
| Alan E.                           | Jones       |                       |                  |             |                                          |                                                         |                                                                                            |
| James                             | Galbraith   |                       |                  |             |                                          |                                                         |                                                                                            |
| Utsav                             | Nandi       |                       |                  |             |                                          |                                                         |                                                                                            |
| Carolyn                           | Hendrickson |                       |                  |             |                                          |                                                         |                                                                                            |
| Kirsten                           | Kangelaris  |                       |                  |             |                                          |                                                         |                                                                                            |
| Taarini                           | Hariharan   |                       |                  |             |                                          |                                                         |                                                                                            |
| Rachel                            | Groper      |                       |                  |             |                                          |                                                         |                                                                                            |
| Kimia                             | Ashktorab   |                       |                  |             |                                          |                                                         |                                                                                            |
| Anika                             | Agrawal     |                       |                  |             |                                          |                                                         |                                                                                            |
| Emma                              | Schmiege    |                       |                  |             |                                          |                                                         |                                                                                            |
| Hanjing                           | Zhuo        |                       |                  |             |                                          |                                                         |                                                                                            |
| Carolyn                           | Leroux      |                       |                  |             |                                          |                                                         |                                                                                            |
| Steven Y.                         | Chang       |                       |                  |             |                                          |                                                         |                                                                                            |
| Gregory W.                        | Hendey      |                       |                  |             |                                          |                                                         |                                                                                            |
| George                            | Lim         |                       |                  |             |                                          |                                                         |                                                                                            |
| Hena                              | Sihota      |                       |                  |             |                                          |                                                         |                                                                                            |
| Joseph E.                         | Levitt      |                       |                  |             |                                          |                                                         |                                                                                            |
| Jenny G.                          | Wilson      |                       |                  |             |                                          |                                                         |                                                                                            |
| Angela J.                         | Rogers      |                       |                  |             |                                          |                                                         |                                                                                            |
| Rosemary                          | Vojnik      |                       |                  |             |                                          |                                                         |                                                                                            |
| Shreya                            | Battu       |                       |                  |             |                                          |                                                         |                                                                                            |
| Cynthia                           | Perez       |                       |                  |             |                                          |                                                         |                                                                                            |
| Timothy E.                        | Albertson   |                       |                  |             |                                          |                                                         |                                                                                            |
| Brian                             | Morrissey   |                       |                  |             |                                          |                                                         |                                                                                            |
| Katherine                         | Wick        |                       |                  |             |                                          |                                                         |                                                                                            |
| Erin                              | Hardy       |                       |                  |             |                                          |                                                         |                                                                                            |
| Ruchira                           | Puri        |                       |                  |             |                                          |                                                         |                                                                                            |
| Tessa                             | Hafenstein  |                       |                  |             |                                          |                                                         |                                                                                            |
| Alyssa                            | Hughes      |                       |                  |             |                                          |                                                         |                                                                                            |
| Eyad                              | Almasri     |                       |                  |             |                                          |                                                         |                                                                                            |
| Shelly                            | Hibbard     |                       |                  |             |                                          |                                                         |                                                                                            |

Supplemental Online Content: Nonauthor Collaborators

\*First name, last name, and suffix (if applicable) are required and will appear in PubMed.

| *First Name and Middle Initial(s) | *Last Name       | *Suffix (eg, Jr, III) | Academic Degrees | Institution | Location (city, state/province, country) | Role or Contribution, eg, chair, principal investigator | Group (if more than 1 Group listed in the byline) and/or Subgroup (eg, Steering Committee) |
|-----------------------------------|------------------|-----------------------|------------------|-------------|------------------------------------------|---------------------------------------------------------|--------------------------------------------------------------------------------------------|
| Bela                              | Patel            |                       |                  |             |                                          |                                                         |                                                                                            |
| Bindu                             | Akkanti          |                       |                  |             |                                          |                                                         |                                                                                            |
| Pratik                            | Doshi            |                       |                  |             |                                          |                                                         |                                                                                            |
| Gabriel                           | Patarroyo Aponte |                       |                  |             |                                          |                                                         |                                                                                            |
| Ryan                              | Huebinger        |                       |                  |             |                                          |                                                         |                                                                                            |
| Elizabeth                         | Vidales          |                       |                  |             |                                          |                                                         |                                                                                            |
| Idorenyin                         | Udoh-Bradford    |                       |                  |             |                                          |                                                         |                                                                                            |
| Neil                              | Aggarwal         |                       |                  |             |                                          |                                                         |                                                                                            |
| Adit A.                           | Ginde            |                       |                  |             |                                          |                                                         |                                                                                            |
| Jeffrey                           | McKeehan         |                       |                  |             |                                          |                                                         |                                                                                            |
| Carrie                            | Higgins          |                       |                  |             |                                          |                                                         |                                                                                            |
| Ashley                            | Licursi          |                       |                  |             |                                          |                                                         |                                                                                            |
| Jennifer                          | Fickes-Siler     |                       |                  |             |                                          |                                                         |                                                                                            |
| Suzanne                           | Slaughter        |                       |                  |             |                                          |                                                         |                                                                                            |
| Emily                             | Johnson          |                       |                  |             |                                          |                                                         |                                                                                            |
| Ivor S.                           | Douglas          |                       |                  |             |                                          |                                                         |                                                                                            |
| Jason                             | Haukoos          |                       |                  |             |                                          |                                                         |                                                                                            |
| Stacy                             | Trent            |                       |                  |             |                                          |                                                         |                                                                                            |
| Terra                             | Hiller           |                       |                  |             |                                          |                                                         |                                                                                            |
| Carolynn                          | Lyle             |                       |                  |             |                                          |                                                         |                                                                                            |
| Ana                               | Garcia           |                       |                  |             |                                          |                                                         |                                                                                            |
| Stephnie                          | Gravitz          |                       |                  |             |                                          |                                                         |                                                                                            |
| Darwin                            | Tran             |                       |                  |             |                                          |                                                         |                                                                                            |
| Mia                               | Lundin           |                       |                  |             |                                          |                                                         |                                                                                            |
| Julie                             | Dunn             |                       |                  |             |                                          |                                                         |                                                                                            |
| Eric                              | Stevens          |                       |                  |             |                                          |                                                         |                                                                                            |
| Nikiah                            | Nudell           |                       |                  |             |                                          |                                                         |                                                                                            |
| Bridget                           | Baxter           |                       |                  |             |                                          |                                                         |                                                                                            |
| Scott                             | Bins             |                       |                  |             |                                          |                                                         |                                                                                            |
| Brittany                          | Smoot            |                       |                  |             |                                          |                                                         |                                                                                            |
| Nichol                            | Huckins          |                       |                  |             |                                          |                                                         |                                                                                            |
| Ivan N.                           | Co               |                       |                  |             |                                          |                                                         |                                                                                            |
| Pauline K.                        | Park             |                       |                  |             |                                          |                                                         |                                                                                            |

## Supplemental Online Content: Nonauthor Collaborators

\*First name, last name, and suffix (if applicable) are required and will appear in PubMed.

| *First Name and Middle Initial(s) | *Last Name | *Suffix (eg, Jr, III) | Academic Degrees | Institution | Location (city, state/province, country) | Role or Contribution, eg, chair, principal investigator | Group (if more than 1 Group listed in the byline) and/or Subgroup (eg, Steering Committee) |
|-----------------------------------|------------|-----------------------|------------------|-------------|------------------------------------------|---------------------------------------------------------|--------------------------------------------------------------------------------------------|
| Robert                            | Hyzy       |                       |                  |             |                                          |                                                         |                                                                                            |
| Kristine                          | Nelson     |                       |                  |             |                                          |                                                         |                                                                                            |
| J. Victor                         | Jiminez    |                       |                  |             |                                          |                                                         |                                                                                            |
| Normal                            | Olbrich    |                       |                  |             |                                          |                                                         |                                                                                            |
| Jakob I.                          | McSparron  |                       |                  |             |                                          |                                                         |                                                                                            |
| Elizabeth                         | Munroe     |                       |                  |             |                                          |                                                         |                                                                                            |
| Phillip                           | Choi       |                       |                  |             |                                          |                                                         |                                                                                            |
| Shijing                           | Jia        |                       |                  |             |                                          |                                                         |                                                                                            |
| Robert                            | Sherwin    |                       |                  |             |                                          |                                                         |                                                                                            |
| Thomas                            | Mazzocco   |                       |                  |             |                                          |                                                         |                                                                                            |
| Lauren                            | Buck       |                       |                  |             |                                          |                                                         |                                                                                            |
| Teja                              | Pandrangi  |                       |                  |             |                                          |                                                         |                                                                                            |
| Jennifer                          | Swiderek   |                       |                  |             |                                          |                                                         |                                                                                            |
| Emanuel P.                        | Rivers     |                       |                  |             |                                          |                                                         |                                                                                            |
| Jasreen Kaur                      | Gill       |                       |                  |             |                                          |                                                         |                                                                                            |
| Jacqueline                        | Day        |                       |                  |             |                                          |                                                         |                                                                                            |
| Anja Kathrina                     | Jaehne     |                       |                  |             |                                          |                                                         |                                                                                            |
| Michelle Ng                       | Gong       |                       |                  |             |                                          |                                                         |                                                                                            |
| Ari                               | Moskowitz  |                       |                  |             |                                          |                                                         |                                                                                            |
| Amira                             | Mohamed    |                       |                  |             |                                          |                                                         |                                                                                            |
| Martha                            | Torres     |                       |                  |             |                                          |                                                         |                                                                                            |
| Ofelia                            | Garcia     |                       |                  |             |                                          |                                                         |                                                                                            |
| Luke                              | Andrea     |                       |                  |             |                                          |                                                         |                                                                                            |
| Brenda                            | Lopez      |                       |                  |             |                                          |                                                         |                                                                                            |
| Sabah                             | Boujid     |                       |                  |             |                                          |                                                         |                                                                                            |
| Manuel Hache                      | Marliere   |                       |                  |             |                                          |                                                         |                                                                                            |
| Lynne D.                          | Richardson |                       |                  |             |                                          |                                                         |                                                                                            |
| Samuel                            | Acquah     |                       |                  |             |                                          |                                                         |                                                                                            |
| Neha                              | Goel       |                       |                  |             |                                          |                                                         |                                                                                            |
| Patrick                           | Maher      |                       |                  |             |                                          |                                                         |                                                                                            |
| Cameron                           | Hypes      |                       |                  |             |                                          |                                                         |                                                                                            |
| Elizabeth Salvagio                | Campbell   |                       |                  |             |                                          |                                                         |                                                                                            |
| Anitza                            | Lopez      |                       |                  |             |                                          |                                                         |                                                                                            |

Supplemental Online Content: Nonauthor Collaborators

\*First name, last name, and suffix (if applicable) are required and will appear in PubMed.

| *First Name and Middle Initial(s) | *Last Name | *Suffix (eg, Jr, III) | Academic Degrees | Institution | Location (city, state/province, country) | Role or Contribution, eg, chair, principal investigator | Group (if more than 1 Group listed in the byline and/or Subgroup (eg, Steering Committee)) |
|-----------------------------------|------------|-----------------------|------------------|-------------|------------------------------------------|---------------------------------------------------------|--------------------------------------------------------------------------------------------|
| Mary                              | Labus      |                       |                  |             |                                          |                                                         |                                                                                            |
| Kristin M.                        | Hudock     |                       |                  |             |                                          |                                                         |                                                                                            |
| R. Duncan                         | Hite       |                       |                  |             |                                          |                                                         |                                                                                            |
| Hammad                            | Tanzeem    |                       |                  |             |                                          |                                                         |                                                                                            |
| Harshada                          | More       |                       |                  |             |                                          |                                                         |                                                                                            |
| Ashraf                            | Khallaf    |                       |                  |             |                                          |                                                         |                                                                                            |
| Benjamin                          | Williams   |                       |                  |             |                                          |                                                         |                                                                                            |
| Abhijit                           | Duggal     |                       |                  |             |                                          |                                                         |                                                                                            |
| Siddharth                         | Dugar      |                       |                  |             |                                          |                                                         |                                                                                            |
| Simon                             | Mucha      |                       |                  |             |                                          |                                                         |                                                                                            |
| Omar                              | Mekhri     |                       |                  |             |                                          |                                                         |                                                                                            |
| Kiran                             | Ashok      |                       |                  |             |                                          |                                                         |                                                                                            |
| Caleb                             | Chang      |                       |                  |             |                                          |                                                         |                                                                                            |
| Sonal                             | Pannu      |                       |                  |             |                                          |                                                         |                                                                                            |
| Matthew                           | Exline     |                       |                  |             |                                          |                                                         |                                                                                            |
| Henry                             | Wang       |                       |                  |             |                                          |                                                         |                                                                                            |
| Sarah                             | Karow      |                       |                  |             |                                          |                                                         |                                                                                            |
| Gabrielle                         | Swoope     |                       |                  |             |                                          |                                                         |                                                                                            |
| Maryiam                           | Khan       |                       |                  |             |                                          |                                                         |                                                                                            |
| David                             | Smith      |                       |                  |             |                                          |                                                         |                                                                                            |
| Madison                           | So         |                       |                  |             |                                          |                                                         |                                                                                            |
| Elli                              | Schwartz   |                       |                  |             |                                          |                                                         |                                                                                            |
| M. Kelly                          | Johnson    |                       |                  |             |                                          |                                                         |                                                                                            |
| D. Clark                          | Files      |                       |                  |             |                                          |                                                         |                                                                                            |
| Chawick                           | Miller     |                       |                  |             |                                          |                                                         |                                                                                            |
| Kevin W.                          | Gibbs      |                       |                  |             |                                          |                                                         |                                                                                            |
| Lori                              | Flores     |                       |                  |             |                                          |                                                         |                                                                                            |
| Lisa                              | Parks      |                       |                  |             |                                          |                                                         |                                                                                            |
| Leigha                            | Landreth   |                       |                  |             |                                          |                                                         |                                                                                            |
| Lauren                            | Koehler    |                       |                  |             |                                          |                                                         |                                                                                            |
| Alpha A. (Berry)                  | Fowler     |                       |                  |             |                                          |                                                         |                                                                                            |
| Marjolein                         | de Wit     |                       |                  |             |                                          |                                                         |                                                                                            |
| Jessica                           | Mason      |                       |                  |             |                                          |                                                         |                                                                                            |

Supplemental Online Content: Nonauthor Collaborators

\*First name, last name, and suffix (if applicable) are required and will appear in PubMed.

| *First Name and Middle Initial(s) | *Last Name | *Suffix (eg, Jr, III) | Academic Degrees | Institution | Location (city, state/province, country) | Role or Contribution, eg, chair, principal investigator | Group (if more than 1 Group listed in the byline) and/or Subgroup (eg, Steering Committee) |
|-----------------------------------|------------|-----------------------|------------------|-------------|------------------------------------------|---------------------------------------------------------|--------------------------------------------------------------------------------------------|
| Aamer                             | Syed       |                       |                  |             |                                          |                                                         |                                                                                            |
| Xian                              | Qiao       |                       |                  |             |                                          |                                                         |                                                                                            |
| Kate                              | Mitchell   |                       |                  |             |                                          |                                                         |                                                                                            |
| Nicholas J.                       | Johnson    |                       |                  |             |                                          |                                                         |                                                                                            |
| Bryce R.H.                        | Robinson   |                       |                  |             |                                          |                                                         |                                                                                            |
| Stephanie                         | Gundel     |                       |                  |             |                                          |                                                         |                                                                                            |
| Megan                             | Fuentes    |                       |                  |             |                                          |                                                         |                                                                                            |
| Maranda                           | Newton     |                       |                  |             |                                          |                                                         |                                                                                            |
| Emily                             | Peterson   |                       |                  |             |                                          |                                                         |                                                                                            |
| Kathryn                           | Thompson   |                       |                  |             |                                          |                                                         |                                                                                            |
| Armando                           | Rodriguez  |                       |                  |             |                                          |                                                         |                                                                                            |
| Thomas                            | Paulsen    |                       |                  |             |                                          |                                                         |                                                                                            |
| Ashdeep                           | Kaur       |                       |                  |             |                                          |                                                         |                                                                                            |
| Catherine L.                      | Hough      |                       |                  |             |                                          |                                                         |                                                                                            |
| Molly                             | Ward       |                       |                  |             |                                          |                                                         |                                                                                            |
| Madeline                          | McDougal   |                       |                  |             |                                          |                                                         |                                                                                            |
| Efrain Chavez                     | Martinez   |                       |                  |             |                                          |                                                         |                                                                                            |
| Edlyn                             | Wolwowicz  |                       |                  |             |                                          |                                                         |                                                                                            |
| Otmar                             | Borchard   | III                   |                  |             |                                          |                                                         |                                                                                            |
| Akram                             | Khan       |                       |                  |             |                                          |                                                         |                                                                                            |
| Peter                             | Chen       |                       |                  |             |                                          |                                                         |                                                                                            |
| Ethan                             | Paschal    |                       |                  |             |                                          |                                                         |                                                                                            |
| Po-En                             | Chen       |                       |                  |             |                                          |                                                         |                                                                                            |
| Yunkee                            | Choi-Kuaea |                       |                  |             |                                          |                                                         |                                                                                            |
| Shane                             | O'Mahony   |                       |                  |             |                                          |                                                         |                                                                                            |
| Julie                             | Wallick    |                       |                  |             |                                          |                                                         |                                                                                            |
| Alexandria                        | Duven      |                       |                  |             |                                          |                                                         |                                                                                            |
| Dakota                            | Fletcher   |                       |                  |             |                                          |                                                         |                                                                                            |
| Alexandria                        | Weissman   |                       |                  |             |                                          |                                                         |                                                                                            |
| Donald                            | Yealy      |                       |                  |             |                                          |                                                         |                                                                                            |
| Denise                            | Scholl     |                       |                  |             |                                          |                                                         |                                                                                            |
| Bryan J.                          | McVerry    |                       |                  |             |                                          |                                                         |                                                                                            |
| David T.                          | Huang      |                       |                  |             |                                          |                                                         |                                                                                            |

Supplemental Online Content: Nonauthor Collaborators

\*First name, last name, and suffix (if applicable) are required and will appear in PubMed.

| *First Name and Middle Initial(s) | *Last Name    | *Suffix (eg, Jr, III) | Academic Degrees | Institution | Location (city, state/province, country) | Role or Contribution, eg, chair, principal investigator | Group (if more than 1 Group listed in the byline) and/or Subgroup (eg, Steering Committee) |
|-----------------------------------|---------------|-----------------------|------------------|-------------|------------------------------------------|---------------------------------------------------------|--------------------------------------------------------------------------------------------|
| Michael A.                        | Turturro      |                       |                  |             |                                          |                                                         |                                                                                            |
| Derek C.                          | Angus         |                       |                  |             |                                          |                                                         |                                                                                            |
| Jordan                            | Schooler      |                       |                  |             |                                          |                                                         |                                                                                            |
| Lawrence E.                       | Kass          |                       |                  |             |                                          |                                                         |                                                                                            |
| Nina T.                           | Gentile       |                       |                  |             |                                          |                                                         |                                                                                            |
| Nathaniel                         | Marchetti     |                       |                  |             |                                          |                                                         |                                                                                            |
| Hannah                            | Reimer        |                       |                  |             |                                          |                                                         |                                                                                            |
| Andrew J.                         | Goodwin       |                       |                  |             |                                          |                                                         |                                                                                            |
| Abby                              | Grady         |                       |                  |             |                                          |                                                         |                                                                                            |
| Caitlan                           | Lematty       |                       |                  |             |                                          |                                                         |                                                                                            |
| Charles                           | Terry         |                       |                  |             |                                          |                                                         |                                                                                            |
| Melissa                           | Blender       |                       |                  |             |                                          |                                                         |                                                                                            |
| Jeffrey                           | Sturek        |                       |                  |             |                                          |                                                         |                                                                                            |
| Mark                              | Sochor        |                       |                  |             |                                          |                                                         |                                                                                            |
| Mary                              | Marshall      |                       |                  |             |                                          |                                                         |                                                                                            |
| Ashley                            | Simpson       |                       |                  |             |                                          |                                                         |                                                                                            |
| Nikhil                            | Patel         |                       |                  |             |                                          |                                                         |                                                                                            |
| Bryce                             | Taylor        |                       |                  |             |                                          |                                                         |                                                                                            |
| Daxita                            | Patem         |                       |                  |             |                                          |                                                         |                                                                                            |
| Jessica                           | Kearney-Bryan |                       |                  |             |                                          |                                                         |                                                                                            |
| Daniel                            | Knox          |                       |                  |             |                                          |                                                         |                                                                                            |
| Lindsay M.                        | Leither       |                       |                  |             |                                          |                                                         |                                                                                            |
| Michael                           | Lanspa        |                       |                  |             |                                          |                                                         |                                                                                            |
| Samuel M.                         | Brown         |                       |                  |             |                                          |                                                         |                                                                                            |
| Ithan                             | Peltan        |                       |                  |             |                                          |                                                         |                                                                                            |
| Andrew                            | Gray          |                       |                  |             |                                          |                                                         |                                                                                            |
| Valerie                           | Aston         |                       |                  |             |                                          |                                                         |                                                                                            |
| Tyler                             | Burke         |                       |                  |             |                                          |                                                         |                                                                                            |
| Joshua                            | Jeppsen       |                       |                  |             |                                          |                                                         |                                                                                            |
| Hunter                            | Marshall      |                       |                  |             |                                          |                                                         |                                                                                            |
| Carolyn                           | Klippel       |                       |                  |             |                                          |                                                         |                                                                                            |
| Brent                             | Armbruster    |                       |                  |             |                                          |                                                         |                                                                                            |
| Darrin                            | Applegate     |                       |                  |             |                                          |                                                         |                                                                                            |

Supplemental Online Content: Nonauthor Collaborators

\*First name, last name, and suffix (if applicable) are required and will appear in PubMed.

| *First Name and Middle Initial(s) | *Last Name | *Suffix (eg, Jr, III) | Academic Degrees | Institution | Location (city, state/province, country) | Role or Contribution, eg, chair, principal investigator | Group (if more than 1 Group listed in the byline) and/or Subgroup (eg, Steering Committee) |
|-----------------------------------|------------|-----------------------|------------------|-------------|------------------------------------------|---------------------------------------------------------|--------------------------------------------------------------------------------------------|
| Estelle                           | Harris     |                       |                  |             |                                          |                                                         |                                                                                            |
| Elizabeth A.                      | Middleton  |                       |                  |             |                                          |                                                         |                                                                                            |
| Sean J.                           | Callahan   |                       |                  |             |                                          |                                                         |                                                                                            |
| Lindsey J.                        | Waddoups   |                       |                  |             |                                          |                                                         |                                                                                            |
| Misty B.                          | Yamane     |                       |                  |             |                                          |                                                         |                                                                                            |
| Macy AG                           | Barrios    |                       |                  |             |                                          |                                                         |                                                                                            |
| Nancy                             | Wickersham |                       |                  |             |                                          |                                                         |                                                                                            |
| Nathan                            | Putz       |                       |                  |             |                                          |                                                         |                                                                                            |
| Samantha                          | Gonski     |                       |                  |             |                                          |                                                         |                                                                                            |
| Jason                             | Lin        |                       |                  |             |                                          |                                                         |                                                                                            |
| Nury                              | Lee        |                       |                  |             |                                          |                                                         |                                                                                            |
| Todd                              | Rice       |                       |                  |             |                                          |                                                         |                                                                                            |
| Lorraine                          | Ware       |                       |                  |             |                                          |                                                         |                                                                                            |
| Wesley H.                         | Self       |                       |                  |             |                                          |                                                         |                                                                                            |
| Margaret                          | Hays       |                       |                  |             |                                          |                                                         |                                                                                            |
| Matthew W.                        | Semler     |                       |                  |             |                                          |                                                         |                                                                                            |
| Liza                              | Frawley    |                       |                  |             |                                          |                                                         |                                                                                            |
| David A.                          | Schoenfeld |                       |                  |             |                                          |                                                         |                                                                                            |
| B. Taylor                         | Thompson   |                       |                  |             |                                          |                                                         |                                                                                            |
| Douglas L.                        | Hayden     |                       |                  |             |                                          |                                                         |                                                                                            |
| Nancy                             | Ringwood   |                       |                  |             |                                          |                                                         |                                                                                            |
| Cathryn                           | Oldmixon   |                       |                  |             |                                          |                                                         |                                                                                            |
| Richard                           | Morse      |                       |                  |             |                                          |                                                         |                                                                                            |
| Ariela                            | Muzikansky |                       |                  |             |                                          |                                                         |                                                                                            |
| Laura                             | Fitzgerald |                       |                  |             |                                          |                                                         |                                                                                            |
| Adrian                            | Lagakos    |                       |                  |             |                                          |                                                         |                                                                                            |
| Weixing                           | Huang      |                       |                  |             |                                          |                                                         |                                                                                            |
| Pouing                            | Lai        |                       |                  |             |                                          |                                                         |                                                                                            |
| Grace                             | Carey      |                       |                  |             |                                          |                                                         |                                                                                            |
| Roy G.                            | Brower     |                       |                  |             |                                          |                                                         |                                                                                            |
| Antonello                         | Punturieri |                       |                  |             |                                          |                                                         |                                                                                            |
| Lora A.                           | Reineck    |                       |                  |             |                                          |                                                         |                                                                                            |



Supplemental Online Content: Nonauthor Collaborators

\*First name, last name, and suffix (if applicable) are required and will appear in PubMed.

| *First Name and Middle Initial(s) | *Last Name | *Suffix (eg, Jr, III) | Academic Degrees | Institution | Location (city, state/province, country) | Role or Contribution, eg, chair, principal investigator | Group (if more than 1 Group listed in the byline) and/or Subgroup (eg, Steering Committee) |
|-----------------------------------|------------|-----------------------|------------------|-------------|------------------------------------------|---------------------------------------------------------|--------------------------------------------------------------------------------------------|
| Karen                             | Beinstock  |                       |                  |             |                                          |                                                         |                                                                                            |
| Ejigayehu                         | Demissie   |                       |                  |             |                                          |                                                         |                                                                                            |
| Michelle                          | Freemer    |                       |                  |             |                                          |                                                         |                                                                                            |
| James                             | Kiley      |                       |                  |             |                                          |                                                         |                                                                                            |
| Lauren                            | Kunz       |                       |                  |             |                                          |                                                         |                                                                                            |
| Mario                             | Stylianou  |                       |                  |             |                                          |                                                         |                                                                                            |
| Myron                             | Maclawiw   |                       |                  |             |                                          |                                                         |                                                                                            |
| Gail                              | Weinmann   |                       |                  |             |                                          |                                                         |                                                                                            |
| Laurie J.                         | Morrison   |                       |                  |             |                                          |                                                         |                                                                                            |
| Daniel                            | Brodie     |                       |                  |             |                                          |                                                         |                                                                                            |
| Charles B.                        | Cairns     |                       |                  |             |                                          |                                                         |                                                                                            |
| Mark N.                           | Gillespie  |                       |                  |             |                                          |                                                         |                                                                                            |
| Richard J.                        | Kryscio    |                       |                  |             |                                          |                                                         |                                                                                            |
| Daman                             | Scales     |                       |                  |             |                                          |                                                         |                                                                                            |
| Robert D.                         | Truog      |                       |                  |             |                                          |                                                         |                                                                                            |
| Polly                             | Parsons    |                       |                  |             |                                          |                                                         |                                                                                            |
| Jason D.                          | Christie   |                       |                  |             |                                          |                                                         |                                                                                            |
| Neal                              | Dickert    | Jr.                   |                  |             |                                          |                                                         |                                                                                            |
| Deborah                           | Diercks    |                       |                  |             |                                          |                                                         |                                                                                            |
| Jesse R.                          | Hall       |                       |                  |             |                                          |                                                         |                                                                                            |
| Nicholas J.                       | Horton     |                       |                  |             |                                          |                                                         |                                                                                            |
| Mitchell                          | Levy       |                       |                  |             |                                          |                                                         |                                                                                            |
| Mark                              | Seigel     |                       |                  |             |                                          |                                                         |                                                                                            |
| Ian                               | Steill     |                       |                  |             |                                          |                                                         |                                                                                            |
| Laurie S.                         | Zoloth     |                       |                  |             |                                          |                                                         |                                                                                            |
| David B.                          | Page       |                       |                  |             |                                          |                                                         |                                                                                            |
| Derek W.                          | Russell    |                       |                  |             |                                          |                                                         |                                                                                            |
| Donna S.                          | Harris     |                       |                  |             |                                          |                                                         |                                                                                            |
| Sheetal                           | Gandotra   |                       |                  |             |                                          |                                                         |                                                                                            |
