# Supplementary material
Source: PubMed Central journal article supplement (PMC11304120)
Supplement: jama-e248772-s004.pdf [file jama-e248772-s004.pdf]

## Data Sharing Statement

Ware. Acetaminophen for Prevention and Treatment of Organ Dysfunction in Critically Ill Patients With Sepsis. *JAMA*. Published May 19, 2024. doi:10.1001/jama.2024.8772

### Data

**Data available:** Yes

**Data types:** Deidentified participant data

**How to access data:** The patient level deidentified ASTER study database will be made publicly available on the NHLBI Biologic Specimen and Data Repository Information Coordinating Center (BioLINCC) website ( <https://biolincc.nhlbi.nih.gov/>) in 2024.

**When available:** With publication

### Supporting Documents

**Document types:** None

### Additional Information

**Who can access the data:** Researchers whose proposed use of the data has been approved

**Types of analyses:** for any approved purpose

**Mechanisms of data availability:** after approval of a proposal
